# Supplementary material for: First-in-Class SAM-Competitive G9a Inhibitor FLAV-27 as a Disease-Modifying Therapy for Alzheimer’s Disease
Source: Research Square preprint supplement (doi:10.21203/rs.3.rs-6940373/v1), 2025-06-26
Supplement: Supplementary file 2 [file 5c5f2d066d272bb3637d56ff.docx]

**Supplementary information: Figures and Tables**

**First-in-Class SAM-Competitive G9a Inhibitor FLAV-27 as a Disease-Modifying Therapy for Alzheimer’s Disease**

Aina Bellver-Sanchis1, David Valle-Garcia2, Carla Barbaraci3, Fernando Romero-Becerra3,4, Rohit Kumar Singh5, Foteini Vasilopoulou6, Alba Irisarri1, Carmen Martínez-Fernández1, Juan A. Fafián-Labora7, María C. Arufe7, Carolin Wüst1, Aida Castellanos8, David Soto8,9, Núria Casals10,11, Rut Fadó10,11, Jennifer M Pocock6, Gemma Navarro12,13,14, Cristina Val15, José Brea15, M. Isabel Loza15, Albert Lleó12,16, Juan Fortea12,16, Daniel Alcolea12,16, Anna Perez-Bosque11,17, Lluïsa Miró11,17, Belén Pérez18, Sajid Rashid19, Muhammad Ali19, Manahil Saqib19, Marcel·lí Carbó1,4, Ana Guerrero1,12, Santiago Vázquez3,4, Bhanwar Singh Choudhary20, Shaodong Dai5, Carmen Escolano3,4, Rafael Franco11,12 , Mercè Pallàs1,12, Christian Griñán-Ferré*1,12

1Department of Pharmacology, Toxicology and Therapeutic Chemistry, Institut de Neurociències-Universitat de Barcelona, Barcelona, Spain.

E-mail: [christian.grinan@ub.edu](mailto:christian.grinan@ub.edu)

2Laboratorio de Epigenómica del Envejecimiento, Centro de Investigación sobre el Envejecimiento, Cinvestav Sede Sur, 14330, Mexico City, Mexico.

3Laboratory of Medicinal Chemistry. Department of Pharmacology, Toxicology and Medicinal Chemistry, Faculty of Pharmacy and Food Sciences, University of Barcelona, Av. Joan XXIII, 27-31, 08028 Barcelona, Spain.

4Institute of Biomedicine of the University of Barcelona (IBUB), Universitat de Barcelona, 08028 Barcelona, Spain.

5Department of Pharmaceutical Sciences, Skaggs School of Pharmacy and Pharmaceutical Sciences, University of Colorado Anschutz Medical Campus, Aurora, CO 80045, USA

6Department of Neuroinflammation, UCL Queen Square Institute of Neurology, University College London, London, WC1N 1PJ, UK.

7Grupo de Terapia Celular y Medicina Regenerativa, Dpto. de Fisioterapia, Medicina y Ciencias Biomédicas. Facultad de Ciencias de la Salud, Universidad de da Coruña, INIBIC-CHUAC, Centro Interdisciplinar de Química y Biología (CICA), 15006, A Coruña, Spain.

8Neurophysiology Laboratory, Department of Biomedicine, Faculty of Medicine and Health Sciences, Institute of Neurosciences, University of Barcelona, 08036 Barcelona, Spain.

9August Pi i Sunyer Biomedical Research Institute (IDIBAPS), Barcelona, 08036 Spain.

10Basic Sciences Department, Faculty of Medicine and Health Sciences, Universitat Internacional de Catalunya, E-08195 Sant Cugat del Vallès, Spain.

11Centro de Investigación Biomédica en Red de Fisiopatología de la Obesidad y la Nutrición (CIBEROBN), Instituto de Salud Carlos III, E-28029 Madrid, Spain.

12Centro de Investigación en Red, Enfermedades Neurodegenerativas (CIBERNED), Instituto de Salud Carlos III, Madrid, Spain.

13Department of Biochemistry and Physiology, School of Pharmacy and Food Sciences, Universitat de Barcelona, 08028 Barcelona, Spain.

14Institut de Neurociències UB, Campus Mundet, Passeig de la Vall d’Hebron 171, 08035 Barcelona, Spain.

15Drug screening Platform/Biofarma Research Group, CIMUS Research Center, University of Santiago de Copostela (USC), Santiago de Compostela 15782, Spain.

16Sant Pau Memory Unit, Department of Neurology, IR SANT PAU, Hospital de la Santa Creu i Sant Pau, 08041 Barcelona, Spain.

17Institut de Nutrició I Seguretat Alimentària de la Universitat de Barcelona, Av. Prat de la Riba, 171, 08921 Santa Coloma de Gramenet, Spain

18Department of Pharmacology, Therapeutic and Toxicology, Universitat Autònoma de Barcelona, 08193 Barcelona, Spain.

19Functional Informatics Lab, National Center for Bioinformatics, Quaid-i-Azam University, Islamabad, Pakistan.

20Department of Pharmacy, Central University of Rajasthan, Ajmer, Rajasthan, India 305817.

Christian Griñán-Ferré

e-mail: [Christian.grinan@ub.edu](mailto:Christian.grinan@ub.edu)

phone: +34 934 024 531

**
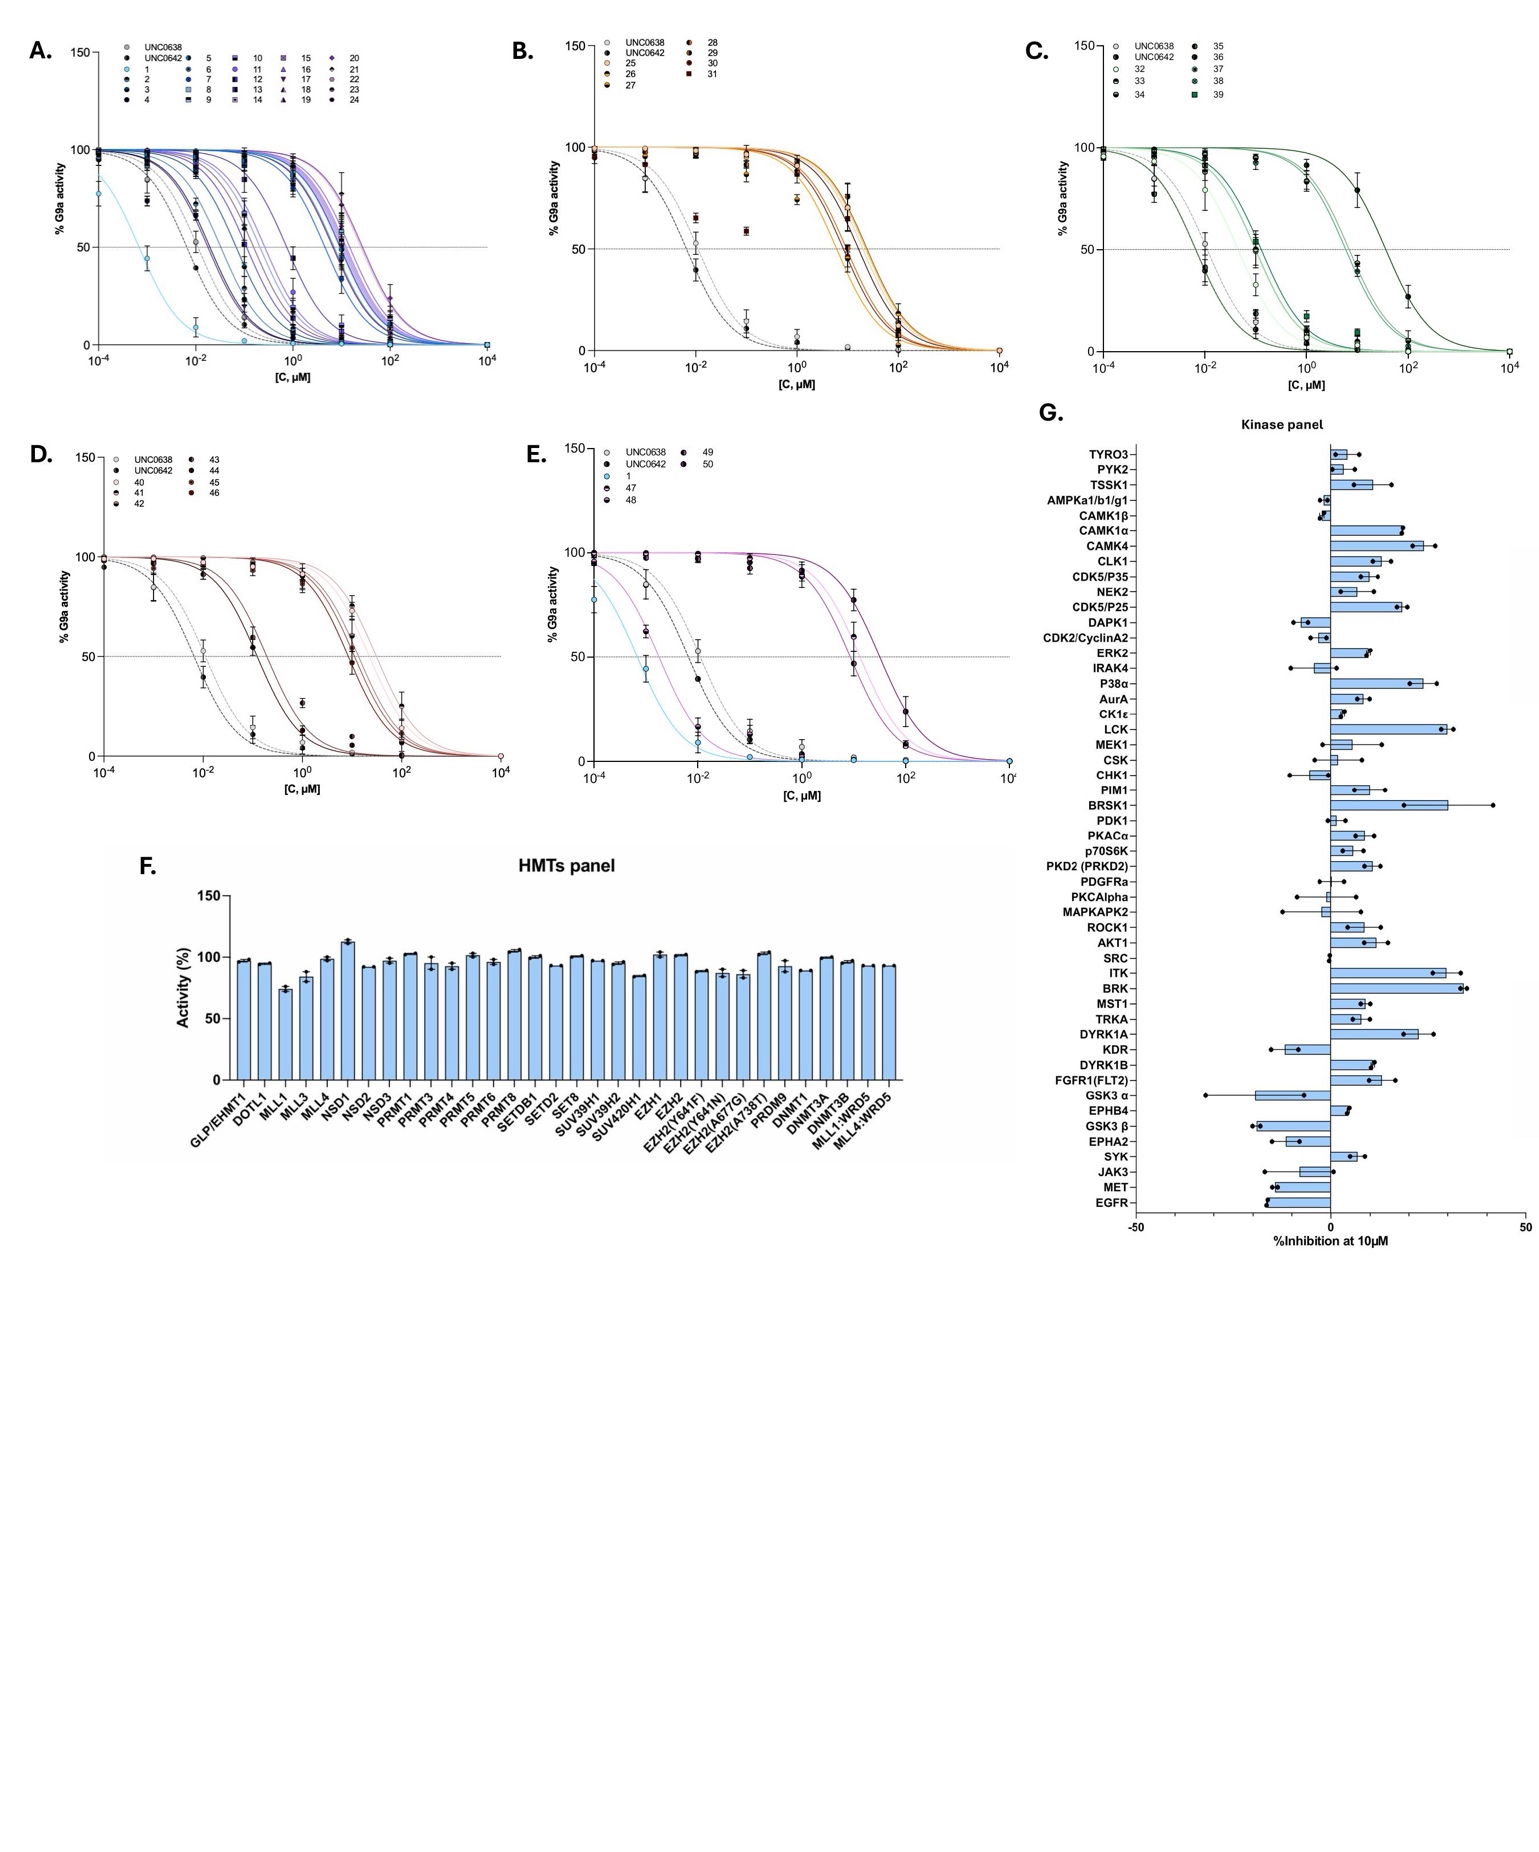
**

**Figure S1**. Representative IC50. graphagainst G9a of the FLAV families. **A.** Compounds with alternative substituents on the phenyl ring of piperidine. **B.** Analogs of FLAV-27 with replacement of the *m*-hydroxyphenyl group by heterocyclic rings. **C.** Compounds with 1,3-oxazepane ring contracted to a morpholine ring. **D.** Compounds with a methyl group on the nitrogen atom of the 1,3-oxazepan ring. **E.** Analogs of FLAV-27 with alternative substituted benzyl ring on the nitrogen of the 1,3-oxazepane. **F.** Selectivity of FLAV-27 against histone methyltransferase enzymes targets at 1 µM.**G.** Selectivity of FLAV-27 against kinase targets at 10 µM.


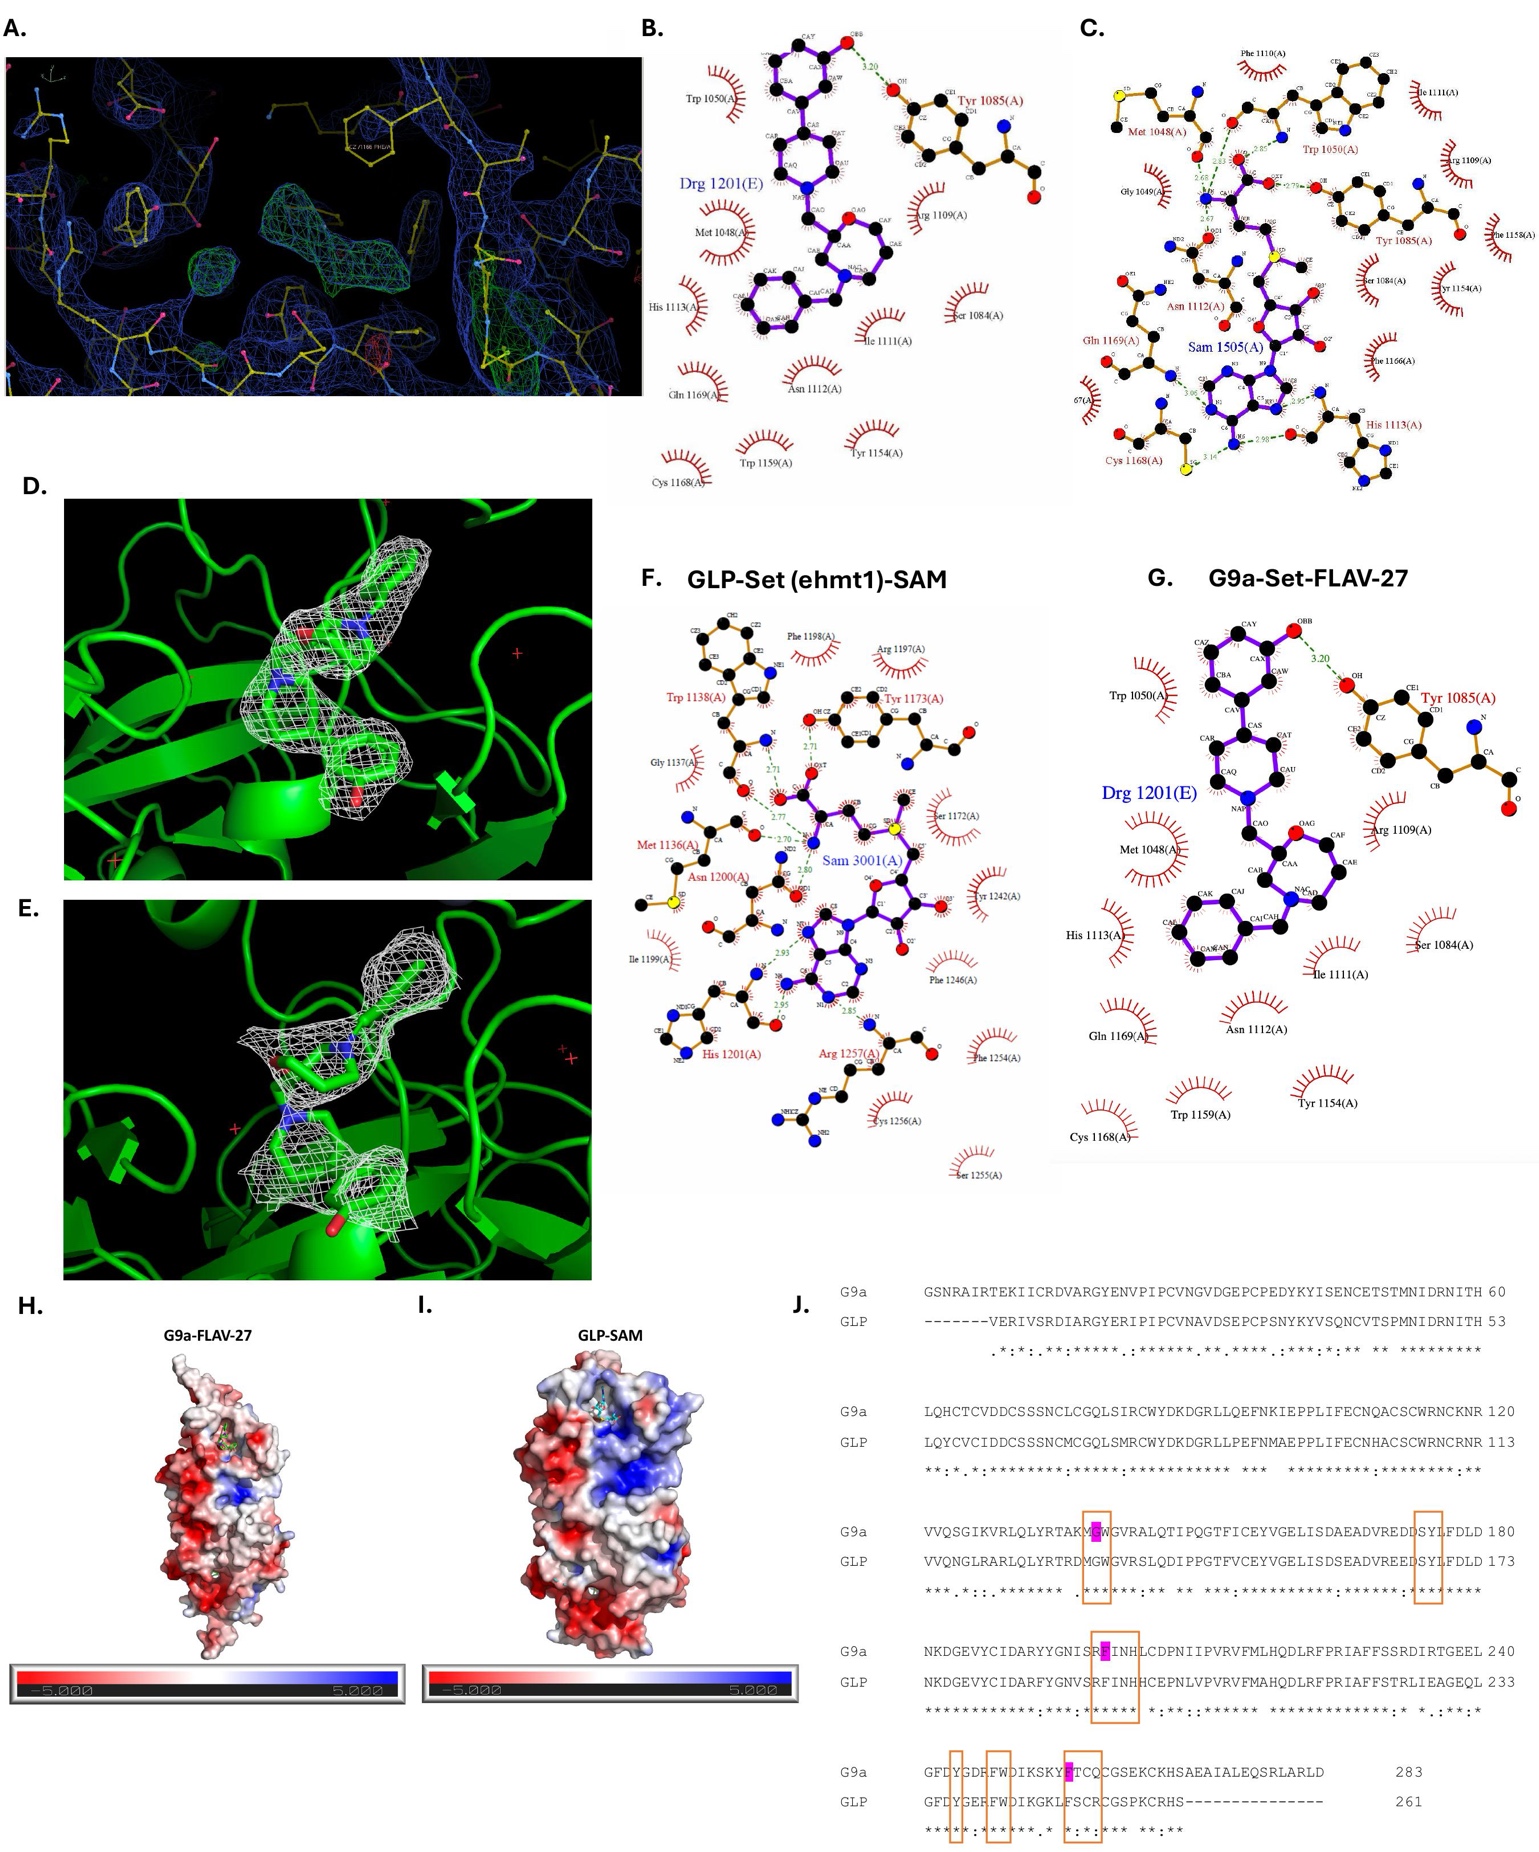


**Figure S2**. **A.** An initial fo-fc map in their SAM binding pocket of G9a after molecular replacement solution. **B.-C.** The ligplot view of FLAV-27 and SAM in the SAM binding pocket of G9a. **D.-E.** Composite (2Fo - Fc, white, contoured at 1σ) and difference (Fo - Fc, white, contoured at 1σ) electron density maps of the FLAV-27 of the refined G9a structure. **F.** Ligplot of GLP and G9a protein. A) Showing the interaction map of SAM ligand with its neighbouring amino acids in the GLP structure. Image is prepared using 5TUZ pdb ID. **G.** Showing the interaction map of FLAV 27 (label as Drg 1201) ligand with its neighbouring amino acids in the G9a structure. Image is prepared using our FLAV27-G9a complex. **H.** Electrostatic potential maps show differences in surface charge distribution. Electrostatic maps for G9a-FLAV27 complex, FLAV27 showing in stick **I.** GLP-SAM (PDB ID; 5TUZ), SAM showing in stick. The surface potentials are represented from anionic (red) to cationic (blue). **J.**  Multiple alignments of deduced amino acid sequences of human G9a and GLP. Residues interacting with SAM and FLAV27 are in the boxes, residues heighted in blue are not participating in interacting with FLAV27 in G9a-FLA27 complex. Dots and colons indicate conserved amino acid substitutions. Dashes indicate gaps. Asterisks indicate identical amino acids. Protein sequences were aligned using the CLUSTAL omega program.


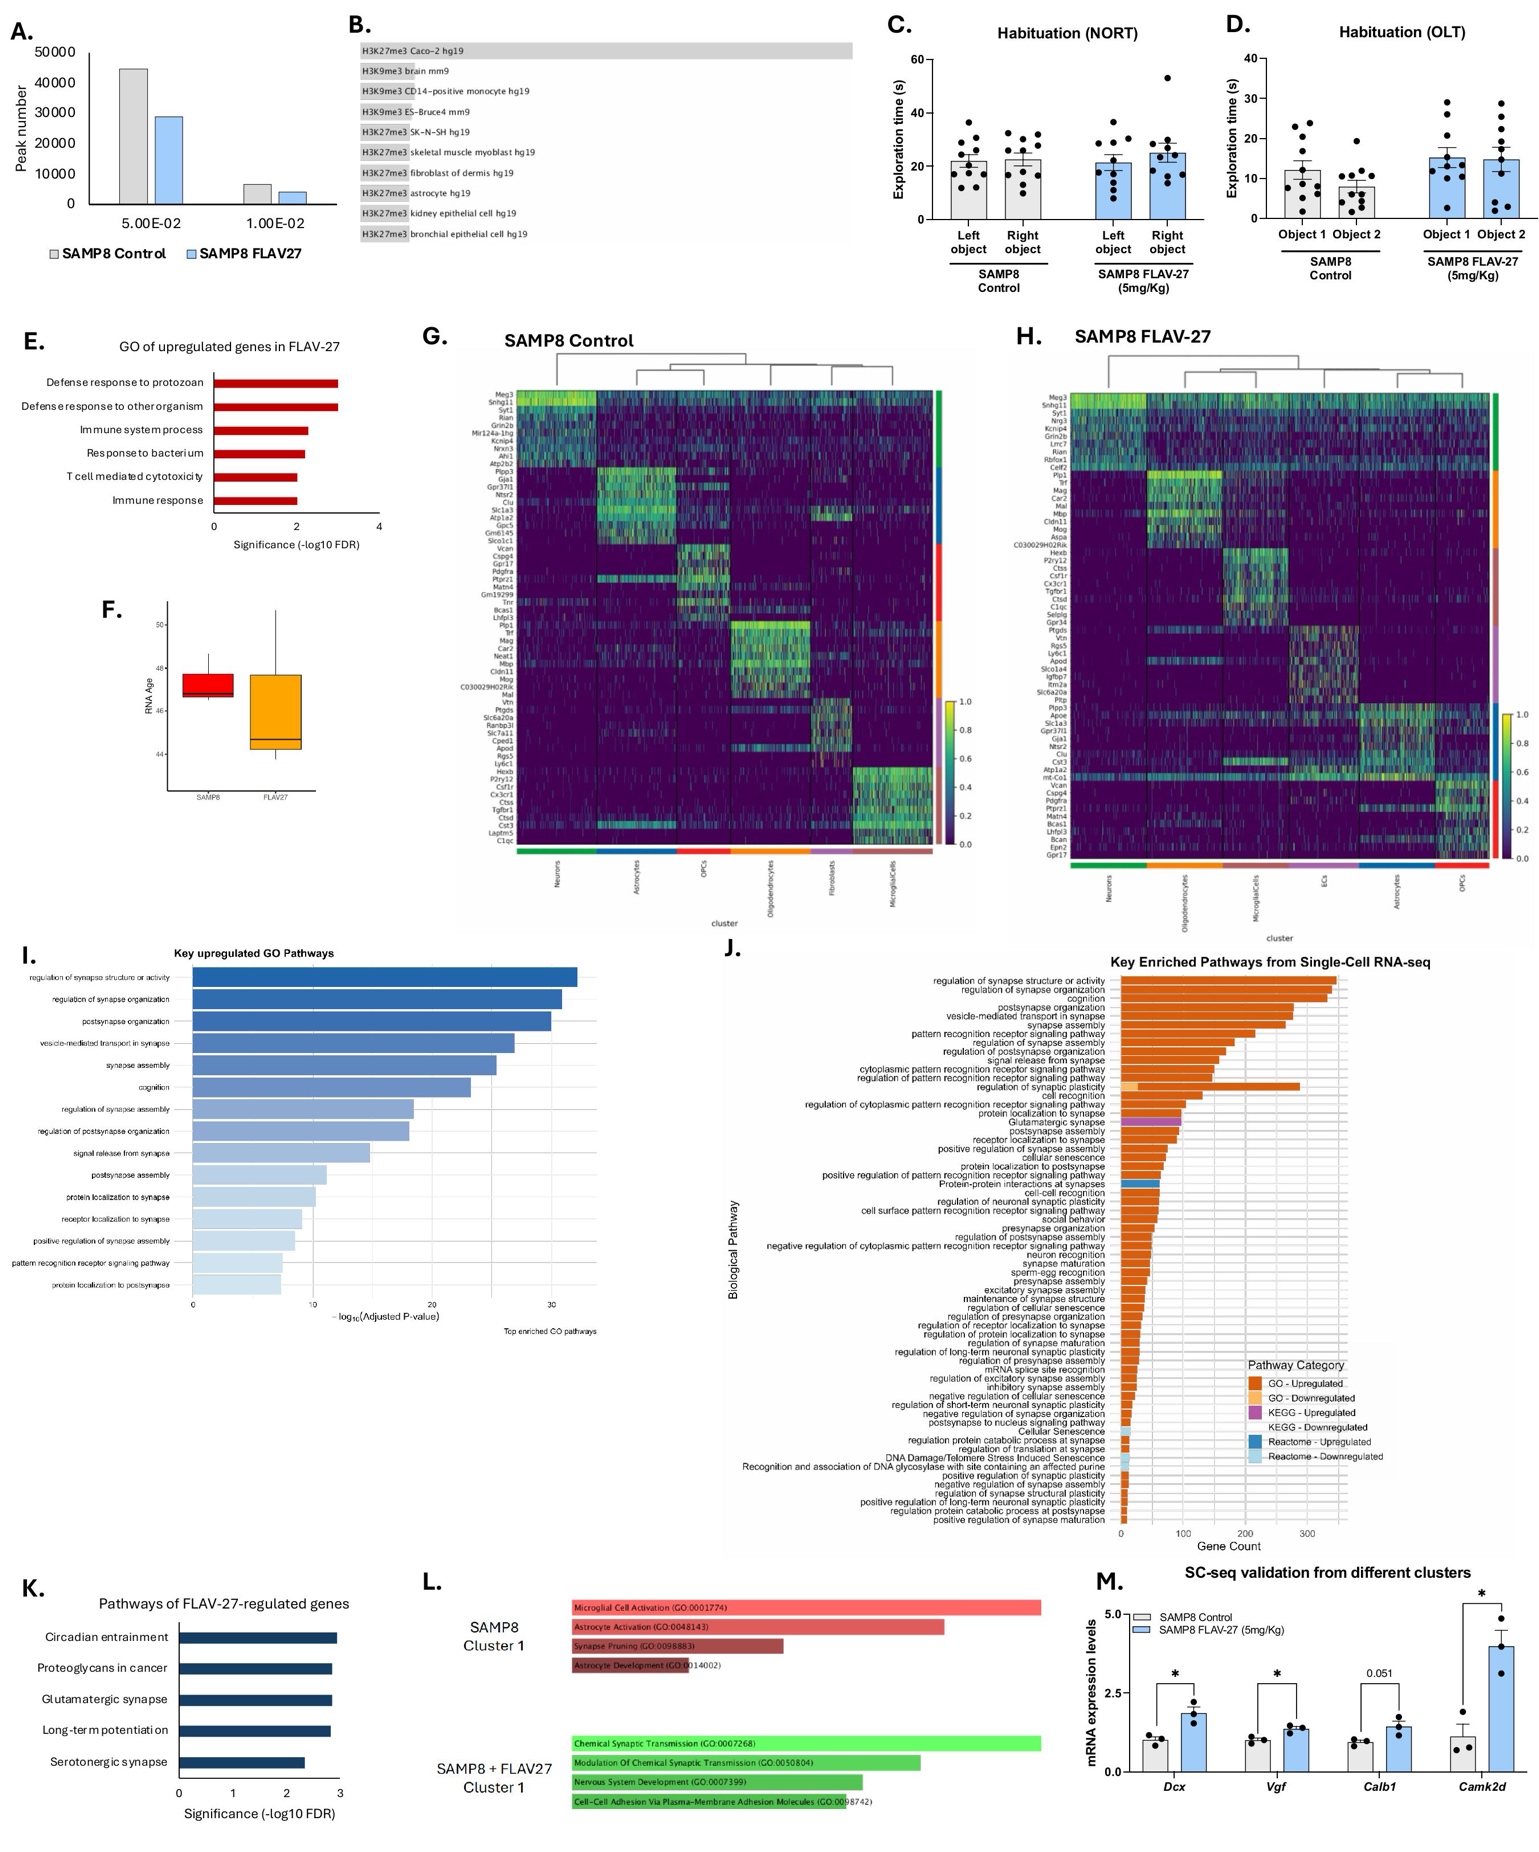


**Figure S3**. **A.** Number of H3K9me2 peaks calculated in control and FLAV-27-treated samples with different cut-offs. **B.** Gene set enrichment of genes close to H3K9me2 peaks that are decreased with FLAV-27 compared to Encode histone dataset. **C.** NORT and **D.** OLT habituation. Values presented as mean ± SEM; (SAMP8 Control n = 10, and SAMP8 FLAV-27 (5mg/Kg) n = 10); Statistics analysis: Student’s t-test analysis. **E.** Gene Ontology analysis of over-expressed genes in bulk RNA-seq. **F.** RNA Age calculation from bulk RNA-seq from Control SAMP8 and FLAV-27-treated SAMP8 mice. Median and SD deviations are shown. **G.** Heatmap of representative (top 10) genes from each cell-type cluster from control and **H.** FLAV27-treated (bottom) from single-cell RNA-seq data. **I.** Bar plot of GO enrichment analysis of upregulated genes according to single-cell RNA-seq data. **J.** Key enriched pathways from single-cell RNA-seq data.

**K.** Pathway enrichment from genes regulated by FLAV-27 according to single-cell RNA-seq data. **L.** GO of representative genes from cluster 1 derived from single-cell RNA-seq from SAMP8 control and SAMP8 FLAV-27-treated mice. **M.** qPCR validation of genes with significant changes in different single-cell clusters: *Dcx*, *Vgf*, *Calb1* and *Camk2d*, respectively. Values presented as mean ± SEM; (N = 2 groups; SAMP8 Control n = 5, and SAMP8 FLAV-27 (5mg/Kg) n = 5); Statistics: Student’s t-test analysis; *p<0.05; **p<0.001.

**
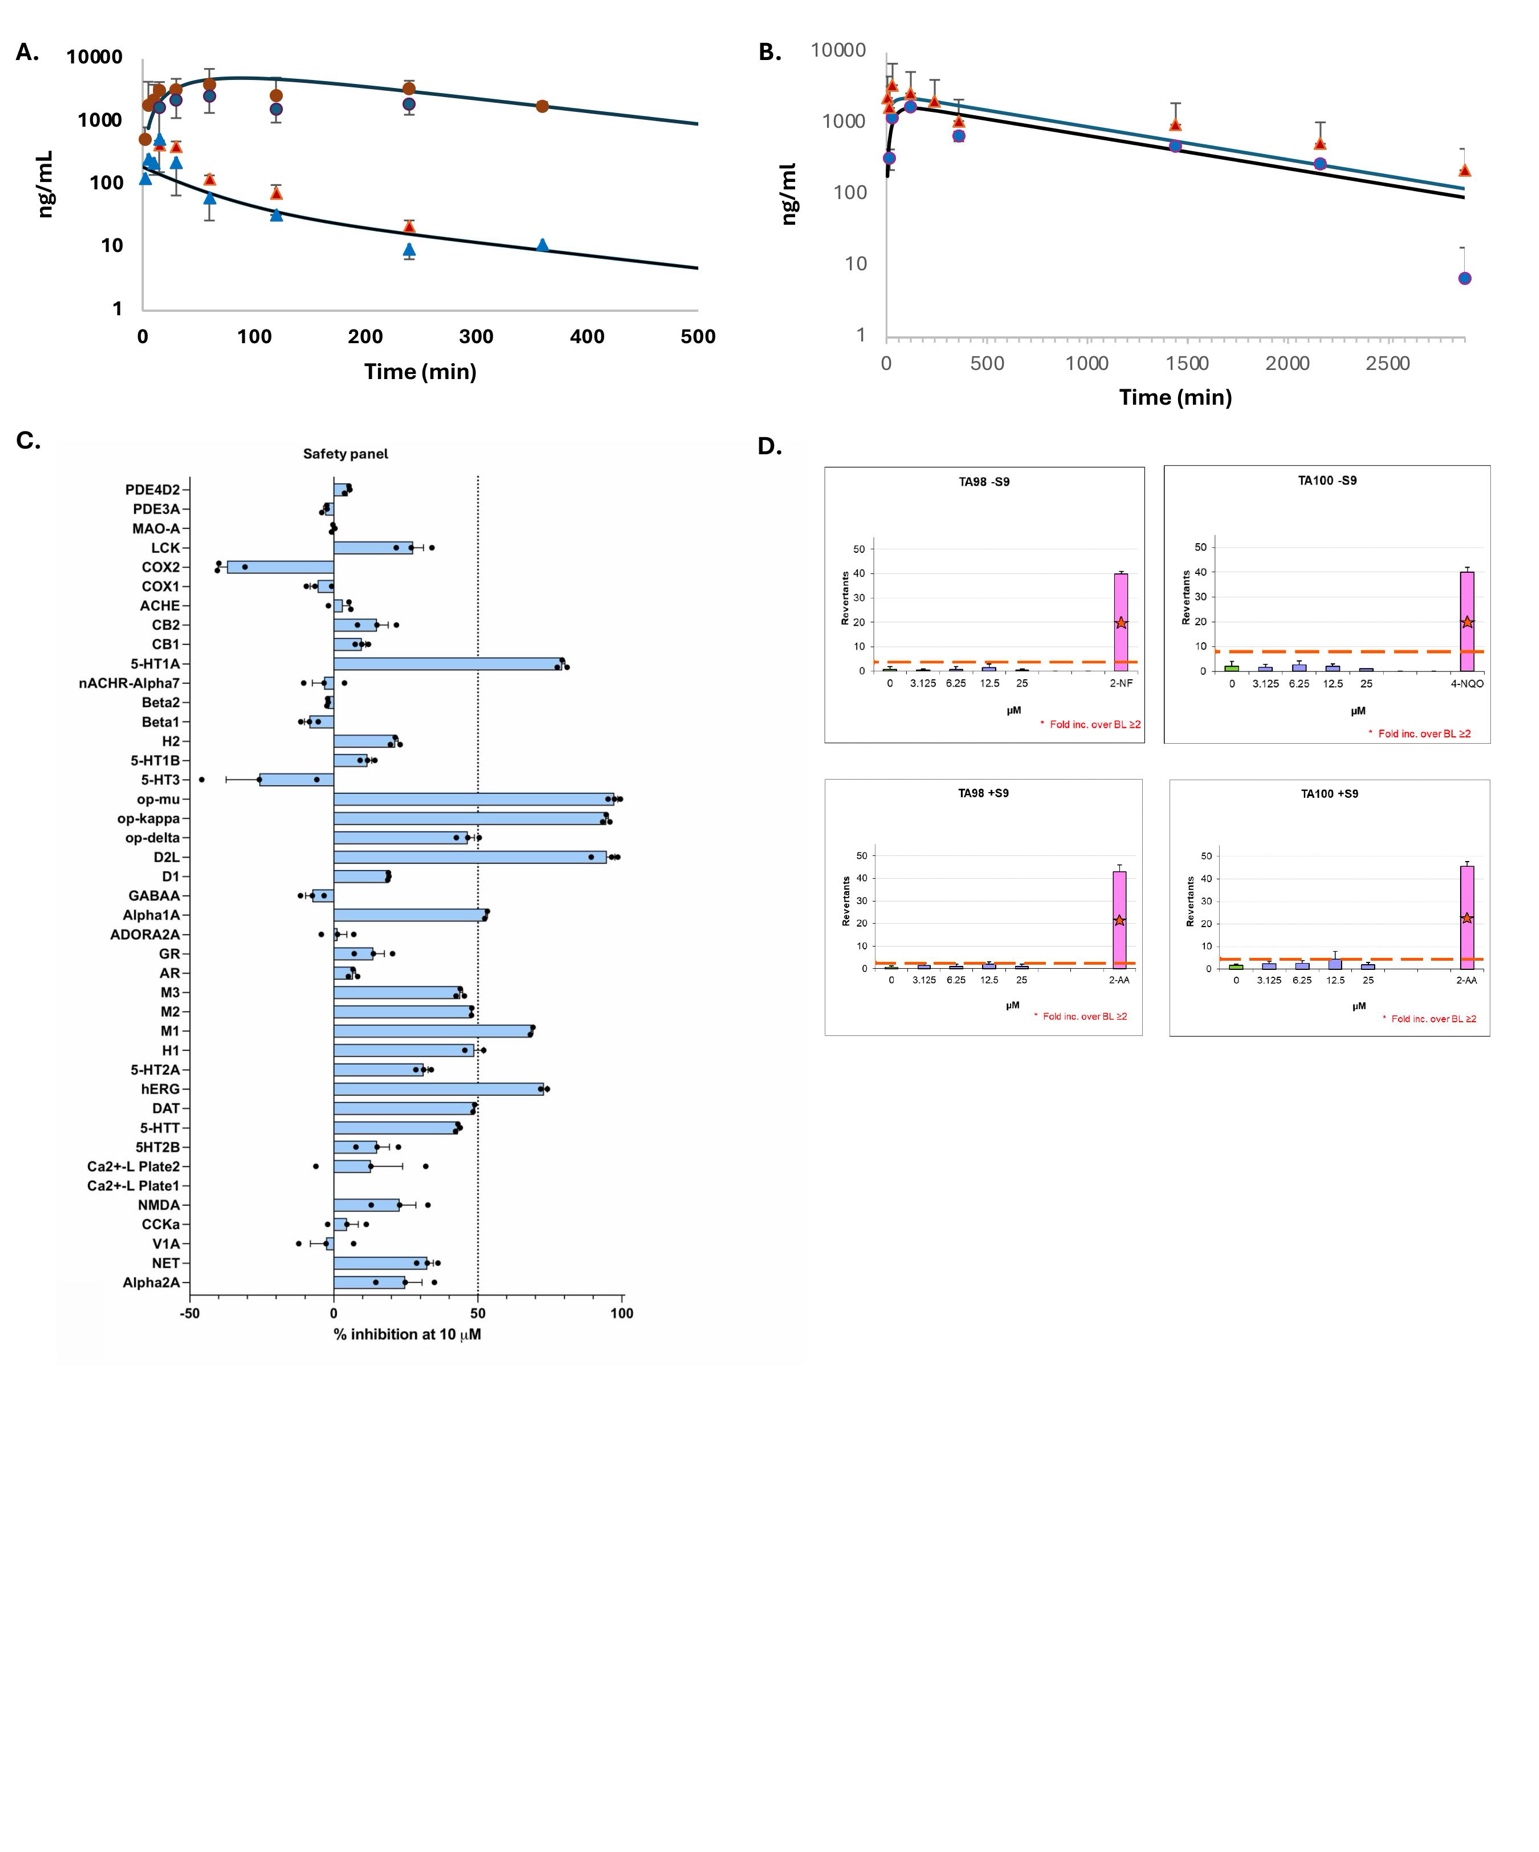
**

**Figure S4.** **A.** Base FLAV-27 plasma concentrations (ng/mL) observed (mean±sd) and predicted after oral (red triangles) and i.p. (red cercles) administration and pharmacokinetic predicted profile (solid black line). FLAV27 brain concentrations (ng/mL) observed (mean±sd) and predicted after oral (red circles) and i.p. (blue circles) administration and pharmacokinetic data fitting (solid black line). **B.**FLAV-27 plasma concentrations (ng/mL) observed (mean±sd; red triangles) and predicted (blue line) and brain concentrations (ng/mL) observed (blue circles) and predicted (black line) after FLAV-27 salt oral administration 5mg/kg. **C.** Safety panel of FLAV-27 at 10 µM. **D.** Number of positive mutated wells of FLAV-27using *Salmonella typhimurium (S. typhimurium)* TA98 andTA100 without S9 activation (Right column).Number of positive mutated wells of FLAV-27using S. typhimurium TA98 and **E.** TA100 with S9 activation (Left column).

**
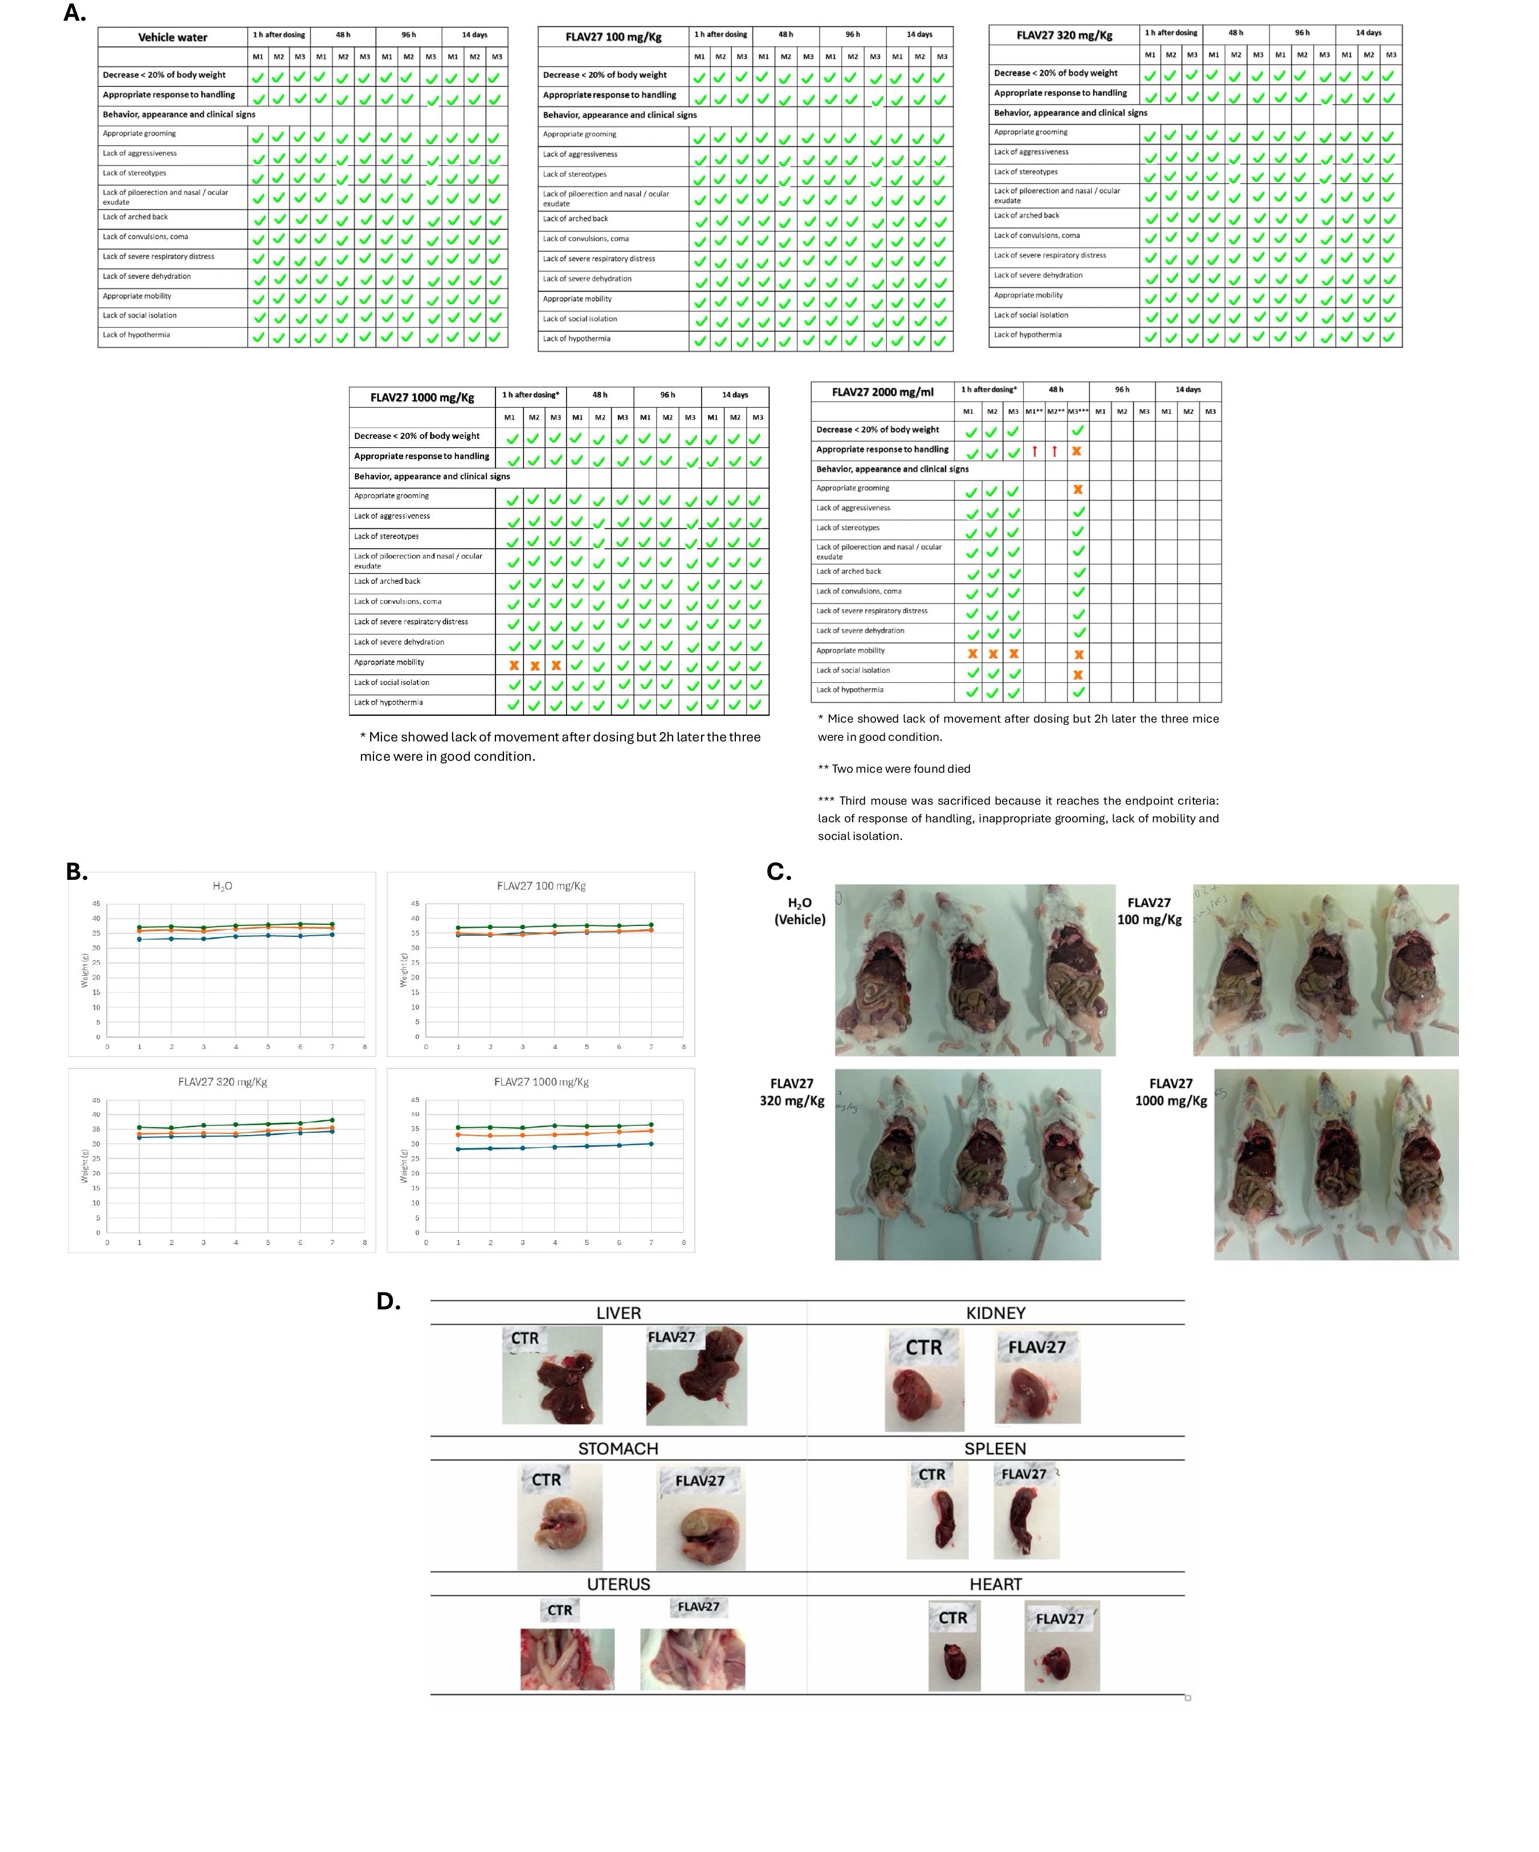
**

**Figure S5. A.** The results of supervision protocol observation are summarized in the figure. **B.** Weights of mice during 14 days of treatment withFLAV-27. The weight (g) of the mice is represented (every 2 days). **C.** Mice were sacrificed 14 days after treatment and gross necropsy were performed, photographs of necropsy are collected. **D.** Mice treated with 1000 mg/Kg FLAV-27 compound after sacrificing compared to control mice: organs comparison.


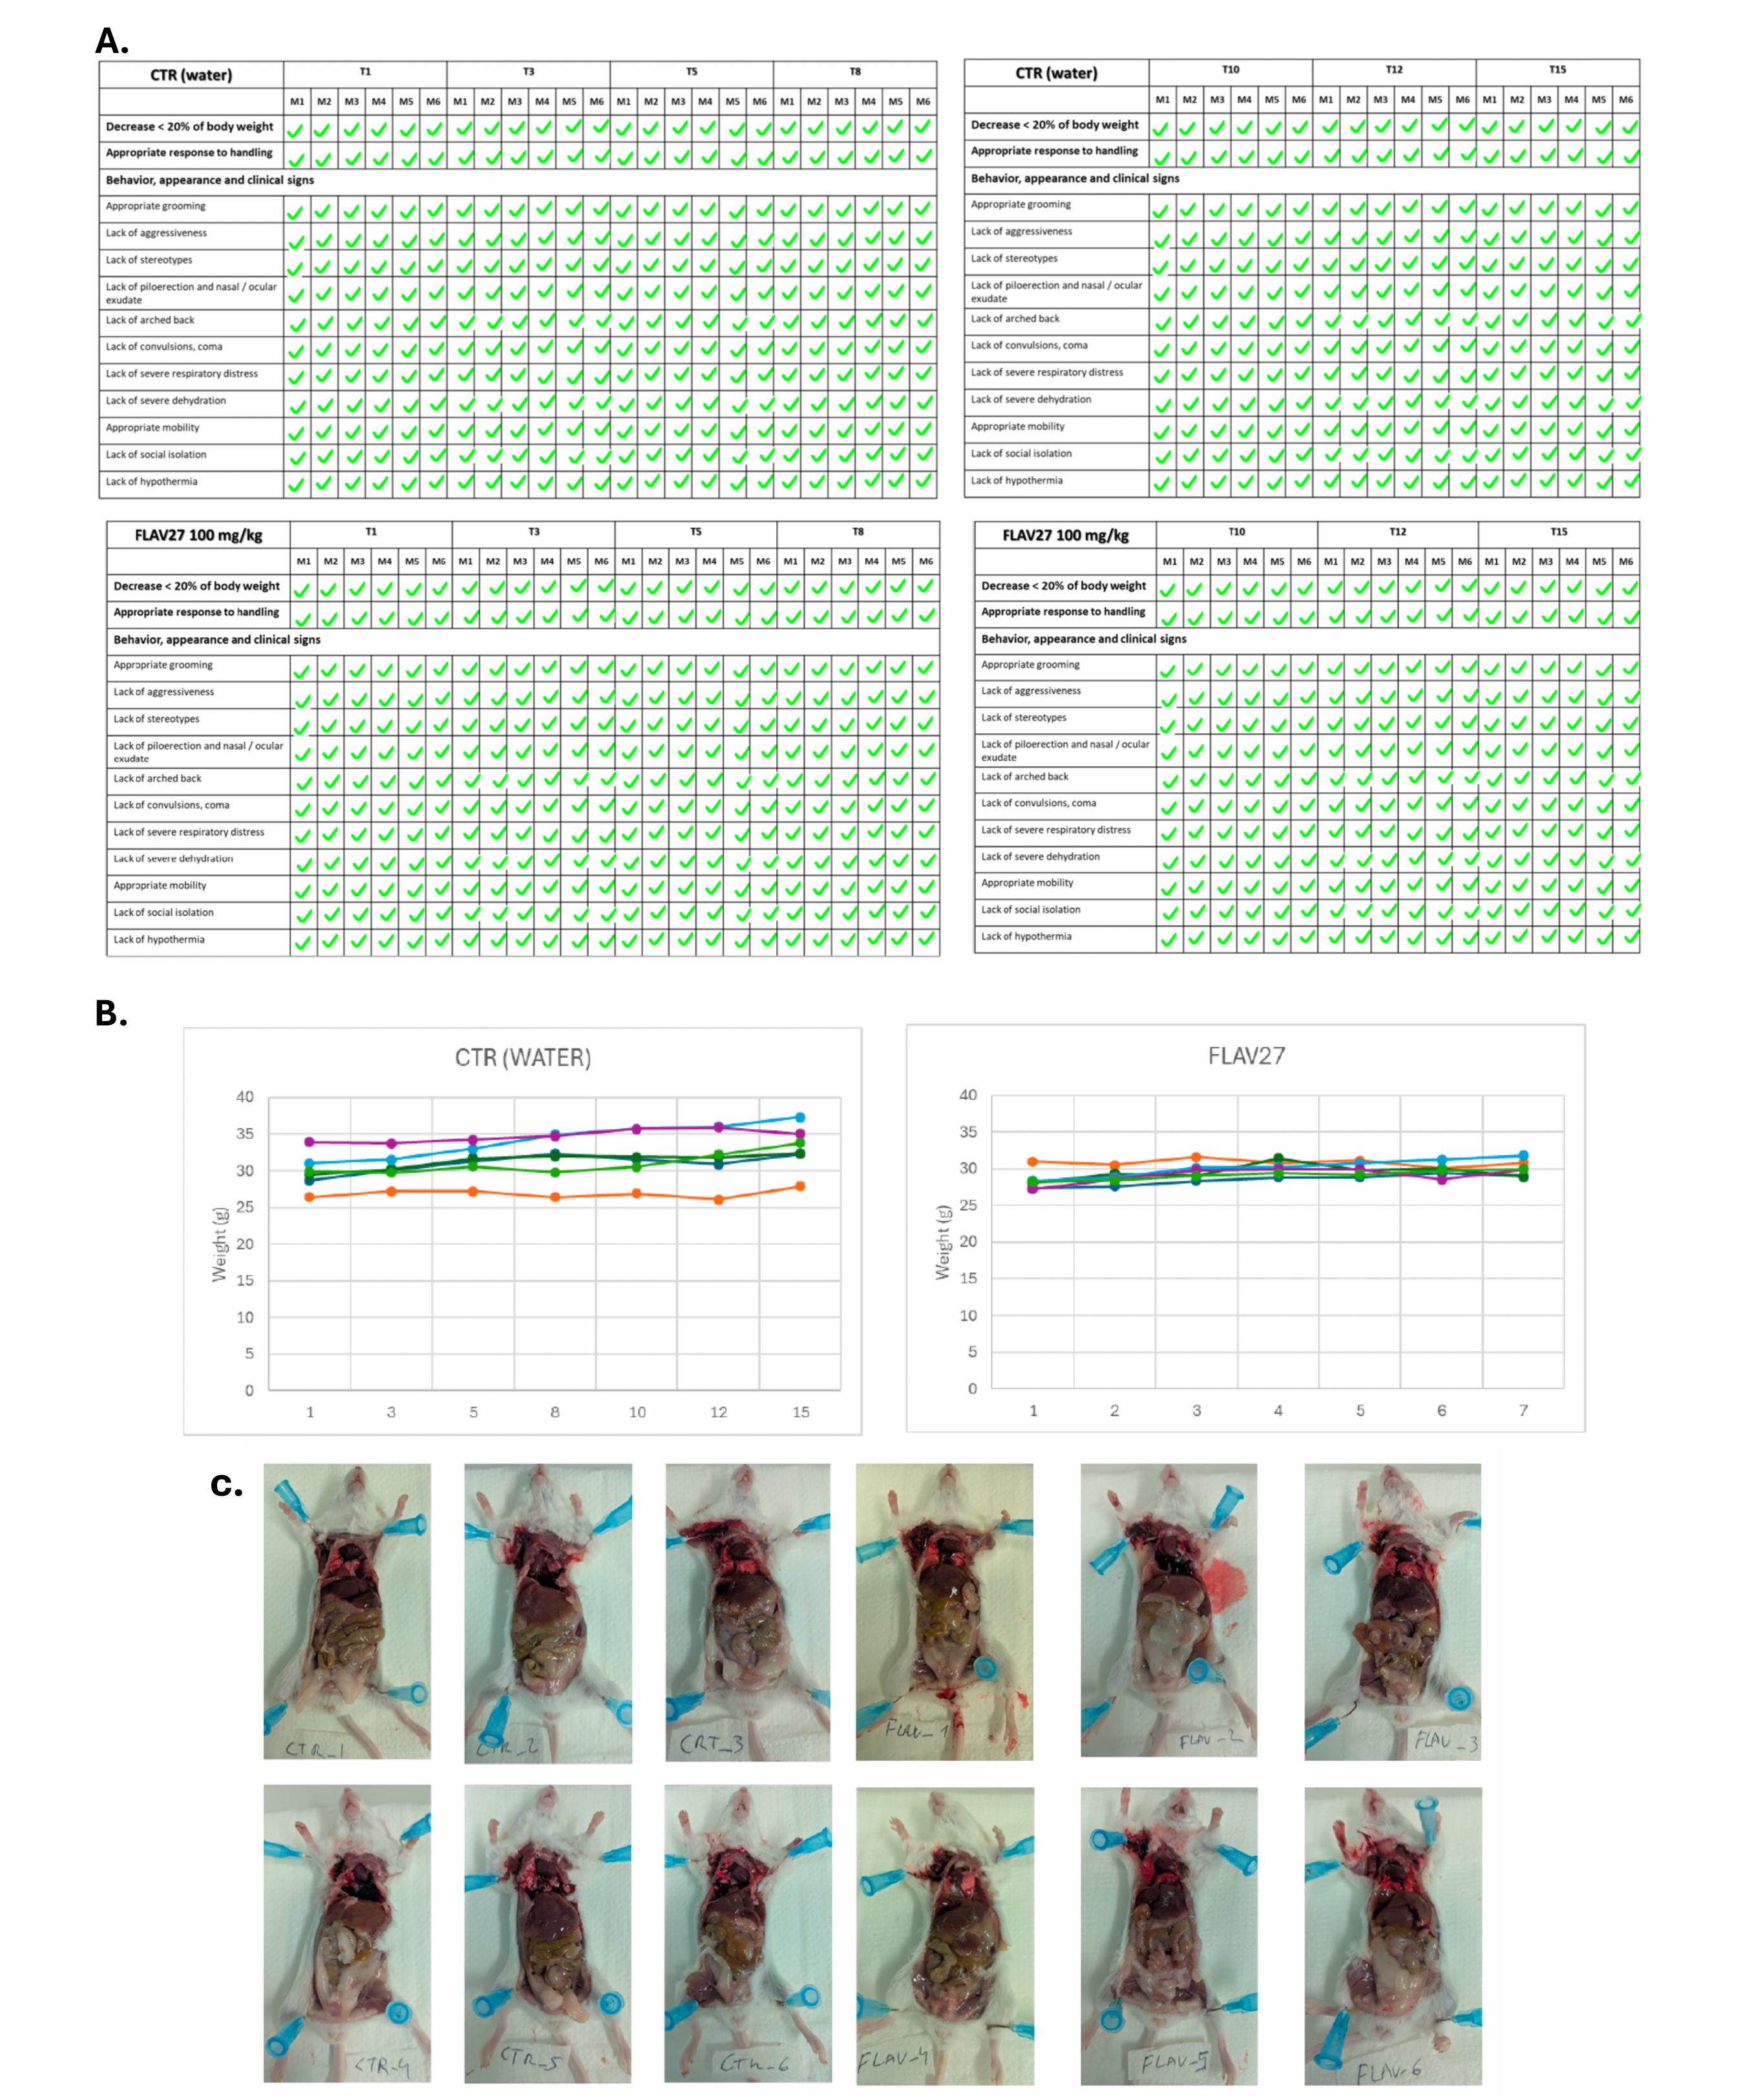


**Figure S6**. **A.** The results of supervision protocol observation are summarized in the following figure. Besides, weights of mice during 14 days of treatment with vehicle and FLAV27. **B.** The weight (g) of the mice is represented (every 2 days). **C**. Mice were sacrificed 72h after last treatment and gross necropsy were performed, photographs of necropsy are collected.


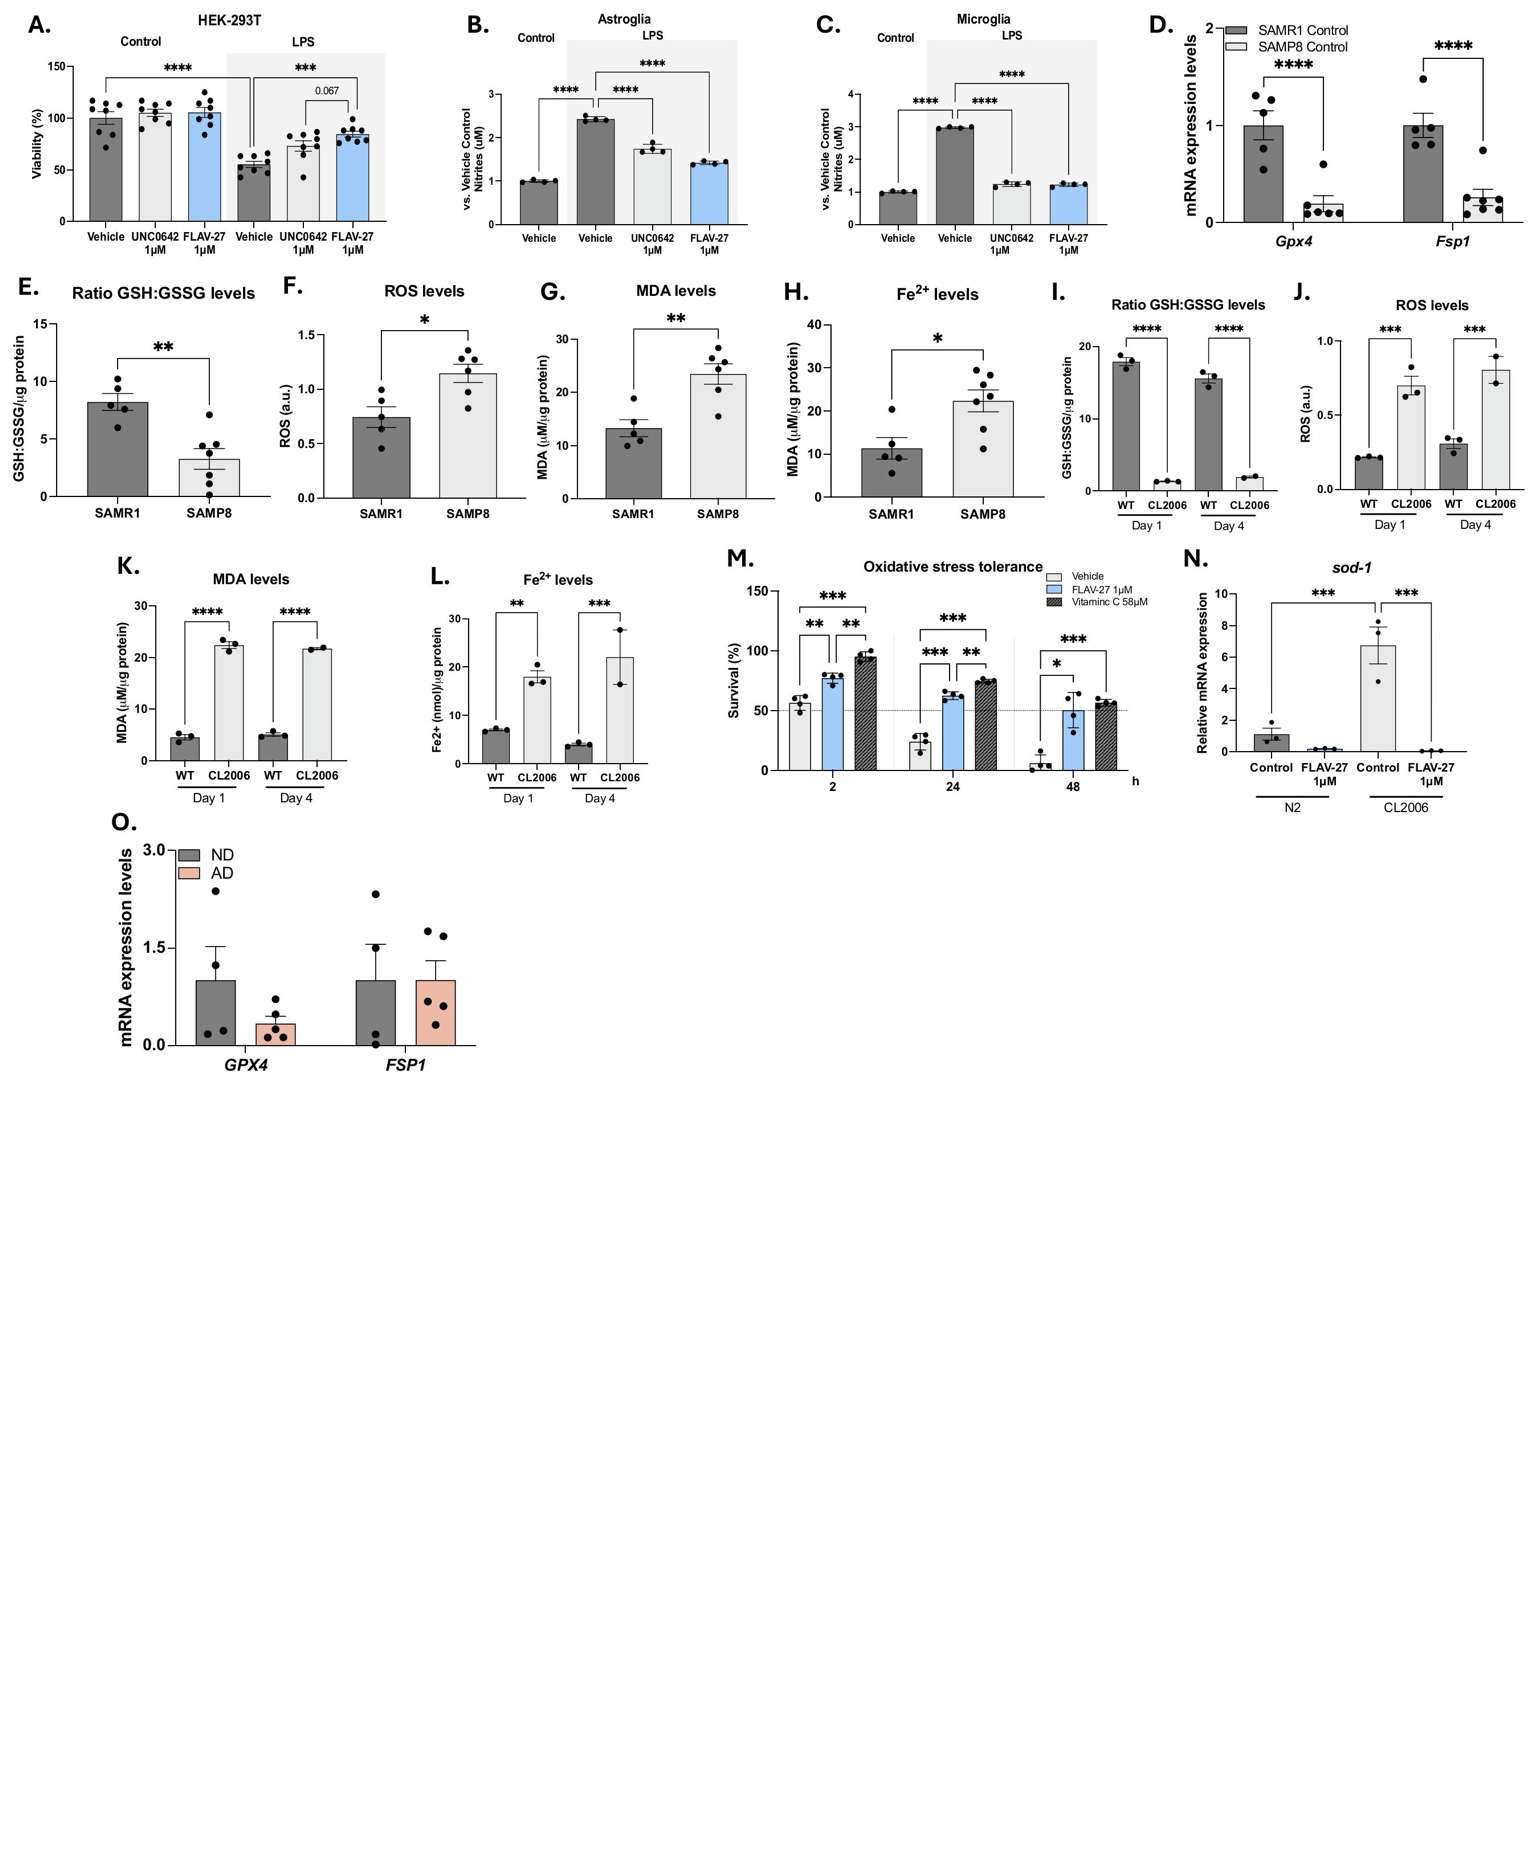


**Figure S7.** **A.** Viability of HEK-293T after LPS insult. Prior to damage, cells were treated with FLAV-27 and UNC0642 at 1µM. Values represented are mean ± SEM; n = 3. Statistical analysis: Two-Way ANOVA. ***p<0.001; ****p<0.0001. **B.** Nitrites levels in Astroglia and **C.** Microglia cells after LPS insult. Prior to damage cells were treated with FLAV-27 and UNC0642 at 1µM. Values represented are mean ± SEM; n = 3. Statistical analysis: One-way ANOVA, followed by Tukey post-hoc analysis. ****p<0.0001. Data are presented as mean ± SEM. Statistical significance was addressed using One-way ANOVA or Two-way ANOVA with Tukey post-hoc analysis; *p<0.05 (n≥3). **D.** Gen expression of *Gpx4*, and *Fsp1*. **E.** Levels of the the ratio GSG:GSSG levels **F.** ROS, **G.** MDA, and **H.** Fe2+ in SAMP8 and SAMR1 control groups**.** Values presented as mean ± SEM. (N = 2 groups; SAMP8 Control n = 5-6, and SAMR1 Control n = 5). Statistics analysis: Student’s t-test analysis; *p<0.05; **p<0.01; ***p<0.001. **I.** Levels of the the ratio GSG:GSSG levels **J.** ROS, **K.** MDA, and **L.** Fe2+ in CL2006 worms, a AD transgenic strain, in comparison with N2. **M.** Summary of the OS response after vehicle, FLAV-27 or Vitamin C treatment. Values represented are mean ± SEM; (N = 3 groups; Four technical replicates with 30 worms/each). *p<0.05; ** p<0.01; ** p<0.001. **N.** Gene expression of *sod-1* of N2 and CL2006 in control and treated conditions. The total transcript amount was measured in triplicate. Statistics: Student’s t-test analysis with Welch correction were performed, ***p<0.001 and ***p<0.001. **O.** Gene expression levels of *GPX4* and *FSP1* in the brains of AD patients compared to non-demented controls. Values presented are the mean ± SEM; (N = 2 groups; Non demented n = 3-4, AD dementia n = 4-5); Statistics analysis: Student’s t-test analysis; *p<0.05; **p<0.01.

**
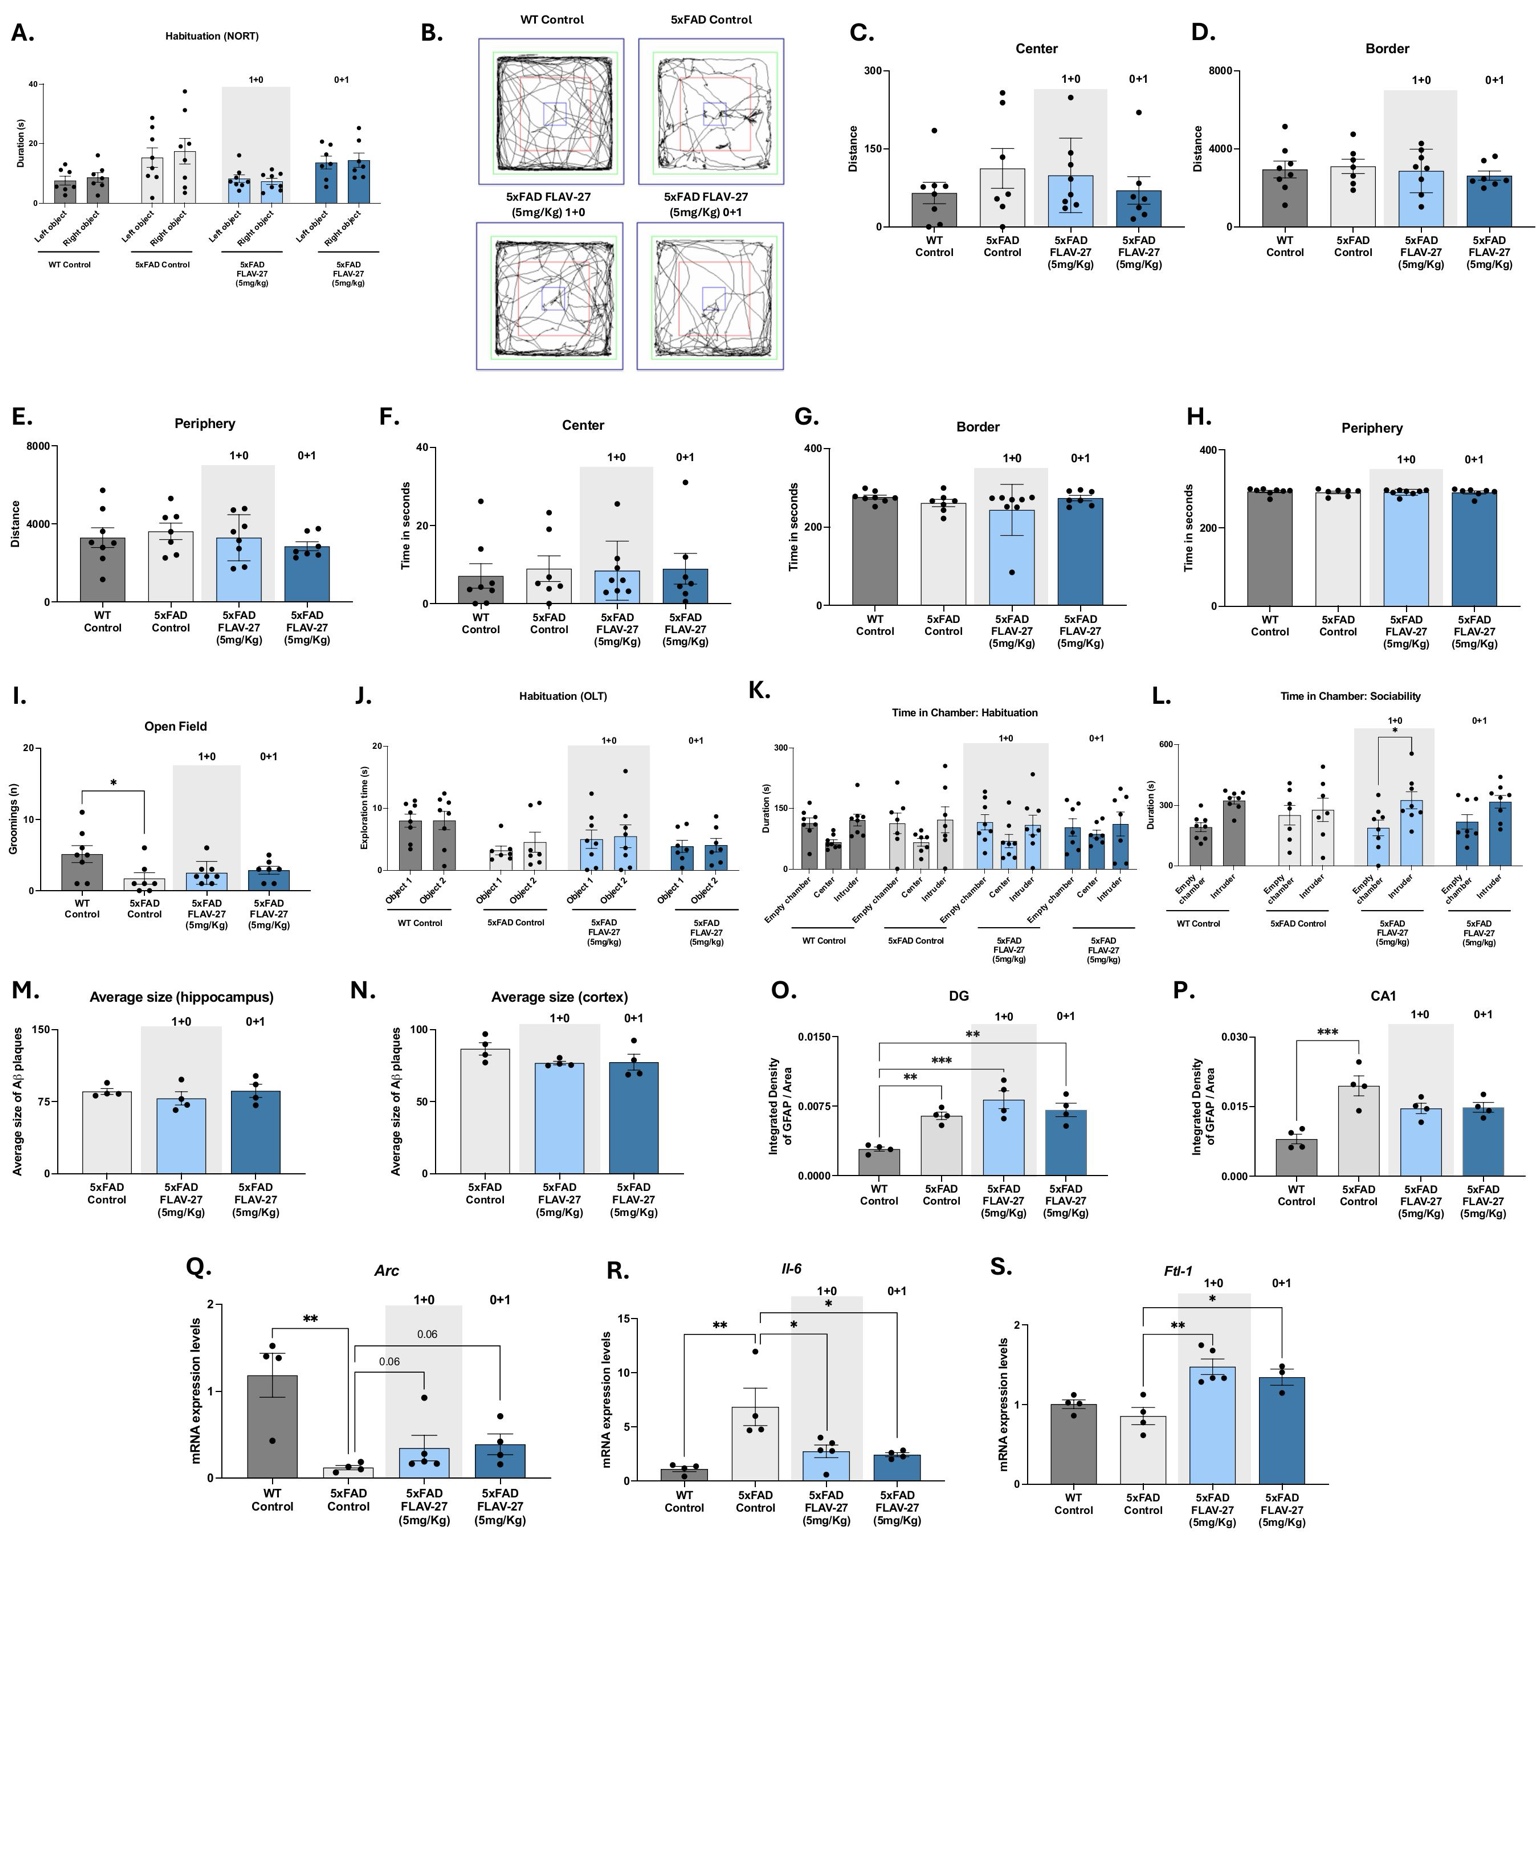
**

**Figure S8**. **A.** NORT: habituation. **B.** OF:traces representation of the distance travelled, **C.-E.** distance and **F.-H.** time in senconds in center, border and periphery, respectively. **I.** Groomings in OF. **J.** OLT: habituation. **K.** TCT: habituation and **L.** sociability time. **M.-N.** Average of Aβ size in hippocampus and cortex, respectively. **O.** Quantification of GFAP levels is also shown specifically in the DG, and **P.** CA1 areas. The mean intensity of GFAP staining is hereby indicated. **Q.** Gene expression levels of *Arc*, **R.** *Il-6*, and **S.** *Ftl-1*. Values presented as the mean ± SEM; (N = 4 groups; WT Control n = 4, 5xFAD Control n = 4, 5xFAD FLAV-27 1+0 (5mg/Kg) n = 4, and 5xFAD FLAV-27 0+1 (5mg/Kg) n = 4); Statistics analysis: One-way ANOVA followed with Tukey post-hoc analysis; *p<0.05; **p<0.01.

**
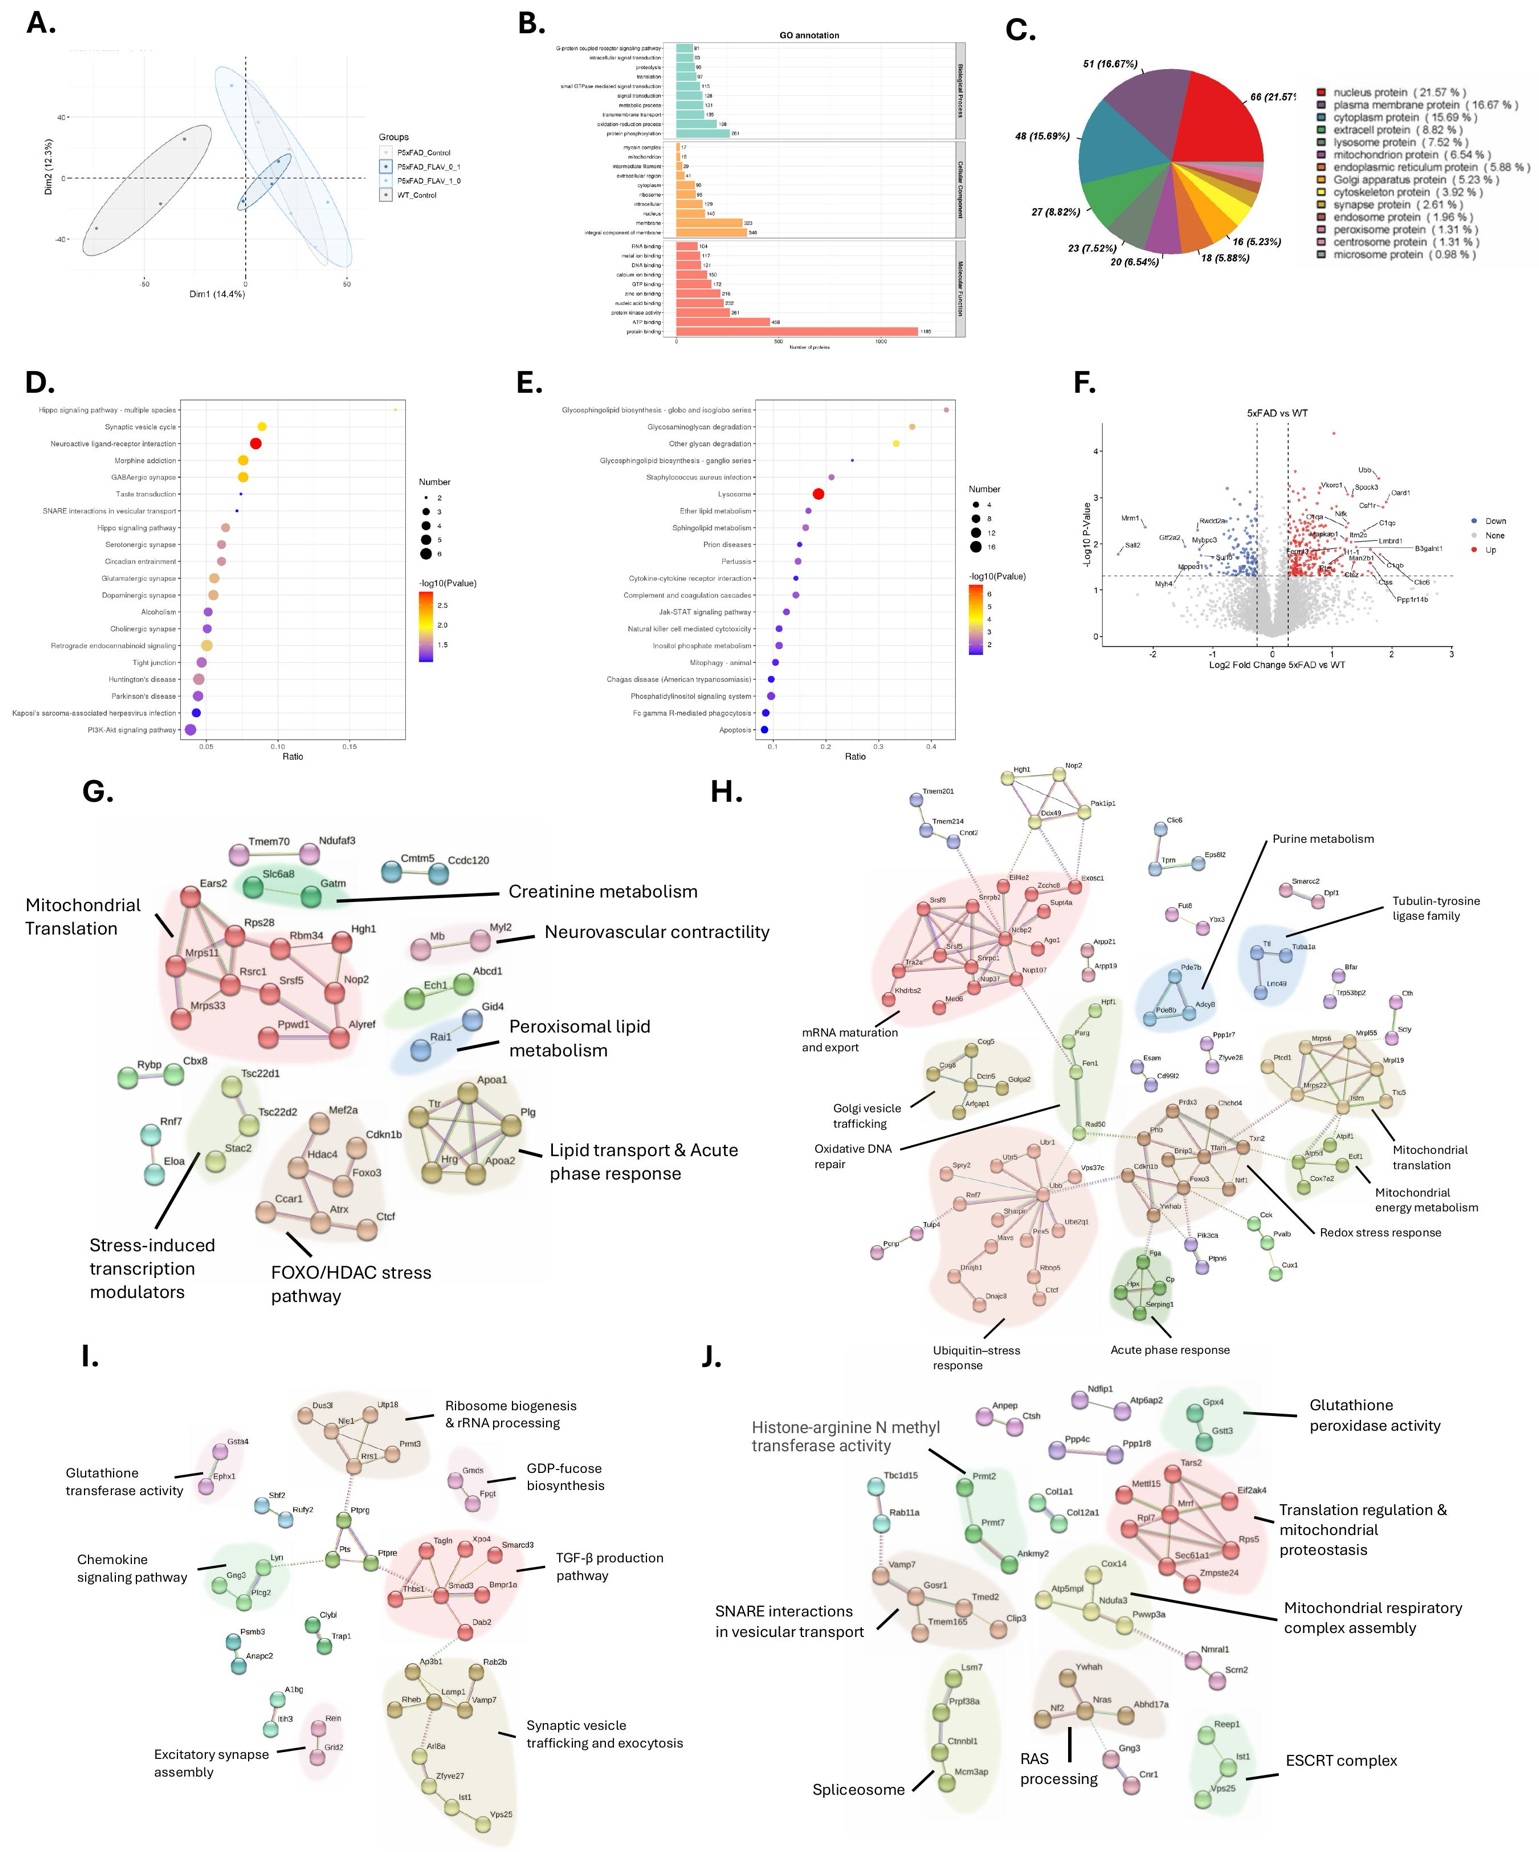
**

**Figure S9.** Overview of proteomic alterations and treatment effects in 5xFAD mice.
**A.** Principal component analysis (PCA) plot of all identified proteins, illustrating the global separation among WT (dark grey), 5xFAD (light grey), and treated groups (light and dark blue ellipses). **B.** Global enrichment analysis of biological processes (GO terms) when considering all groups together. **C.** Pie chart showing the proportion of up- and down-regulated proteins in 5xFAD versus WT. **D.- E.** Pathway and GO enrichment for down-regulated and up-regulated proteins in 5xFAD versus WT. The size and color of the dots represent the number of proteins mapped to each pathway and the statistical significance, respectively. **F.** Volcano plots depicting differential protein expression in 5XFAD mice respect to WT mice. Proteins with significant up- or down-regulation (based on adjusted p-value and fold-change thresholds) are shown in red and blue, respectively. **G.** Protein–protein interaction networks of differentially downregulated proteins in 5XFAD treated mice with FLAV27_1_0 and FLAV27_0_1. The map displays distinct functional groups involved in neuronal and synaptic signaling, cellular metabolism, proteostasis, as well as membrane trafficking and signal transduction. Proteins with a minimum interaction score of 0.4 were included, and clustering was performed using the MCL algorithm with an inflation parameter of 1.2. **H.** Distinct clusters center on processes such as synaptic pruning, phosphatidylinositol signaling, B cell signaling, and cytoskeletal organization. Here, proteins were included at a minimum interaction score of 0.4, and MCL clustering was conducted with an inflation parameter of 1.7. Proteins significantly reversed by treatment are also indicated with frames. These data suggest that both increases and decreases in protein levels contribute to disease-related alterations in metabolic pathways, vesicle trafficking, immune function, and neuronal signaling.*Clustering performed using the MCL algorithm (Enright et al., 2002).* **I.** Protein–protein interaction networks of differentially upregulated proteins in 5XFAD treated mice with FLAV27_1_0 and FLAV27_0_1. The map displays distinct functional groups involved in neuronal and synaptic signaling, cellular metabolism, proteostasis, as well as membrane trafficking and signal transduction. Proteins with a minimum interaction score of 0.4 were included, and clustering was performed using the MCL algorithm with an inflation parameter of 2.0. **J.** Protein clusters in this panel are enriched in mitochondrial respiratory complex assembly, translation regulation and mitochondrial proteostasis, SNARE-mediated vesicular transport, and the ESCRT complex. Additional modules include glutathione peroxidase activity, histone-arginine methylation, splicing, and RAS processing. STRING confidence cutoff was set to 0.4 and MCL clustering used an inflation parameter of 2.0.

**
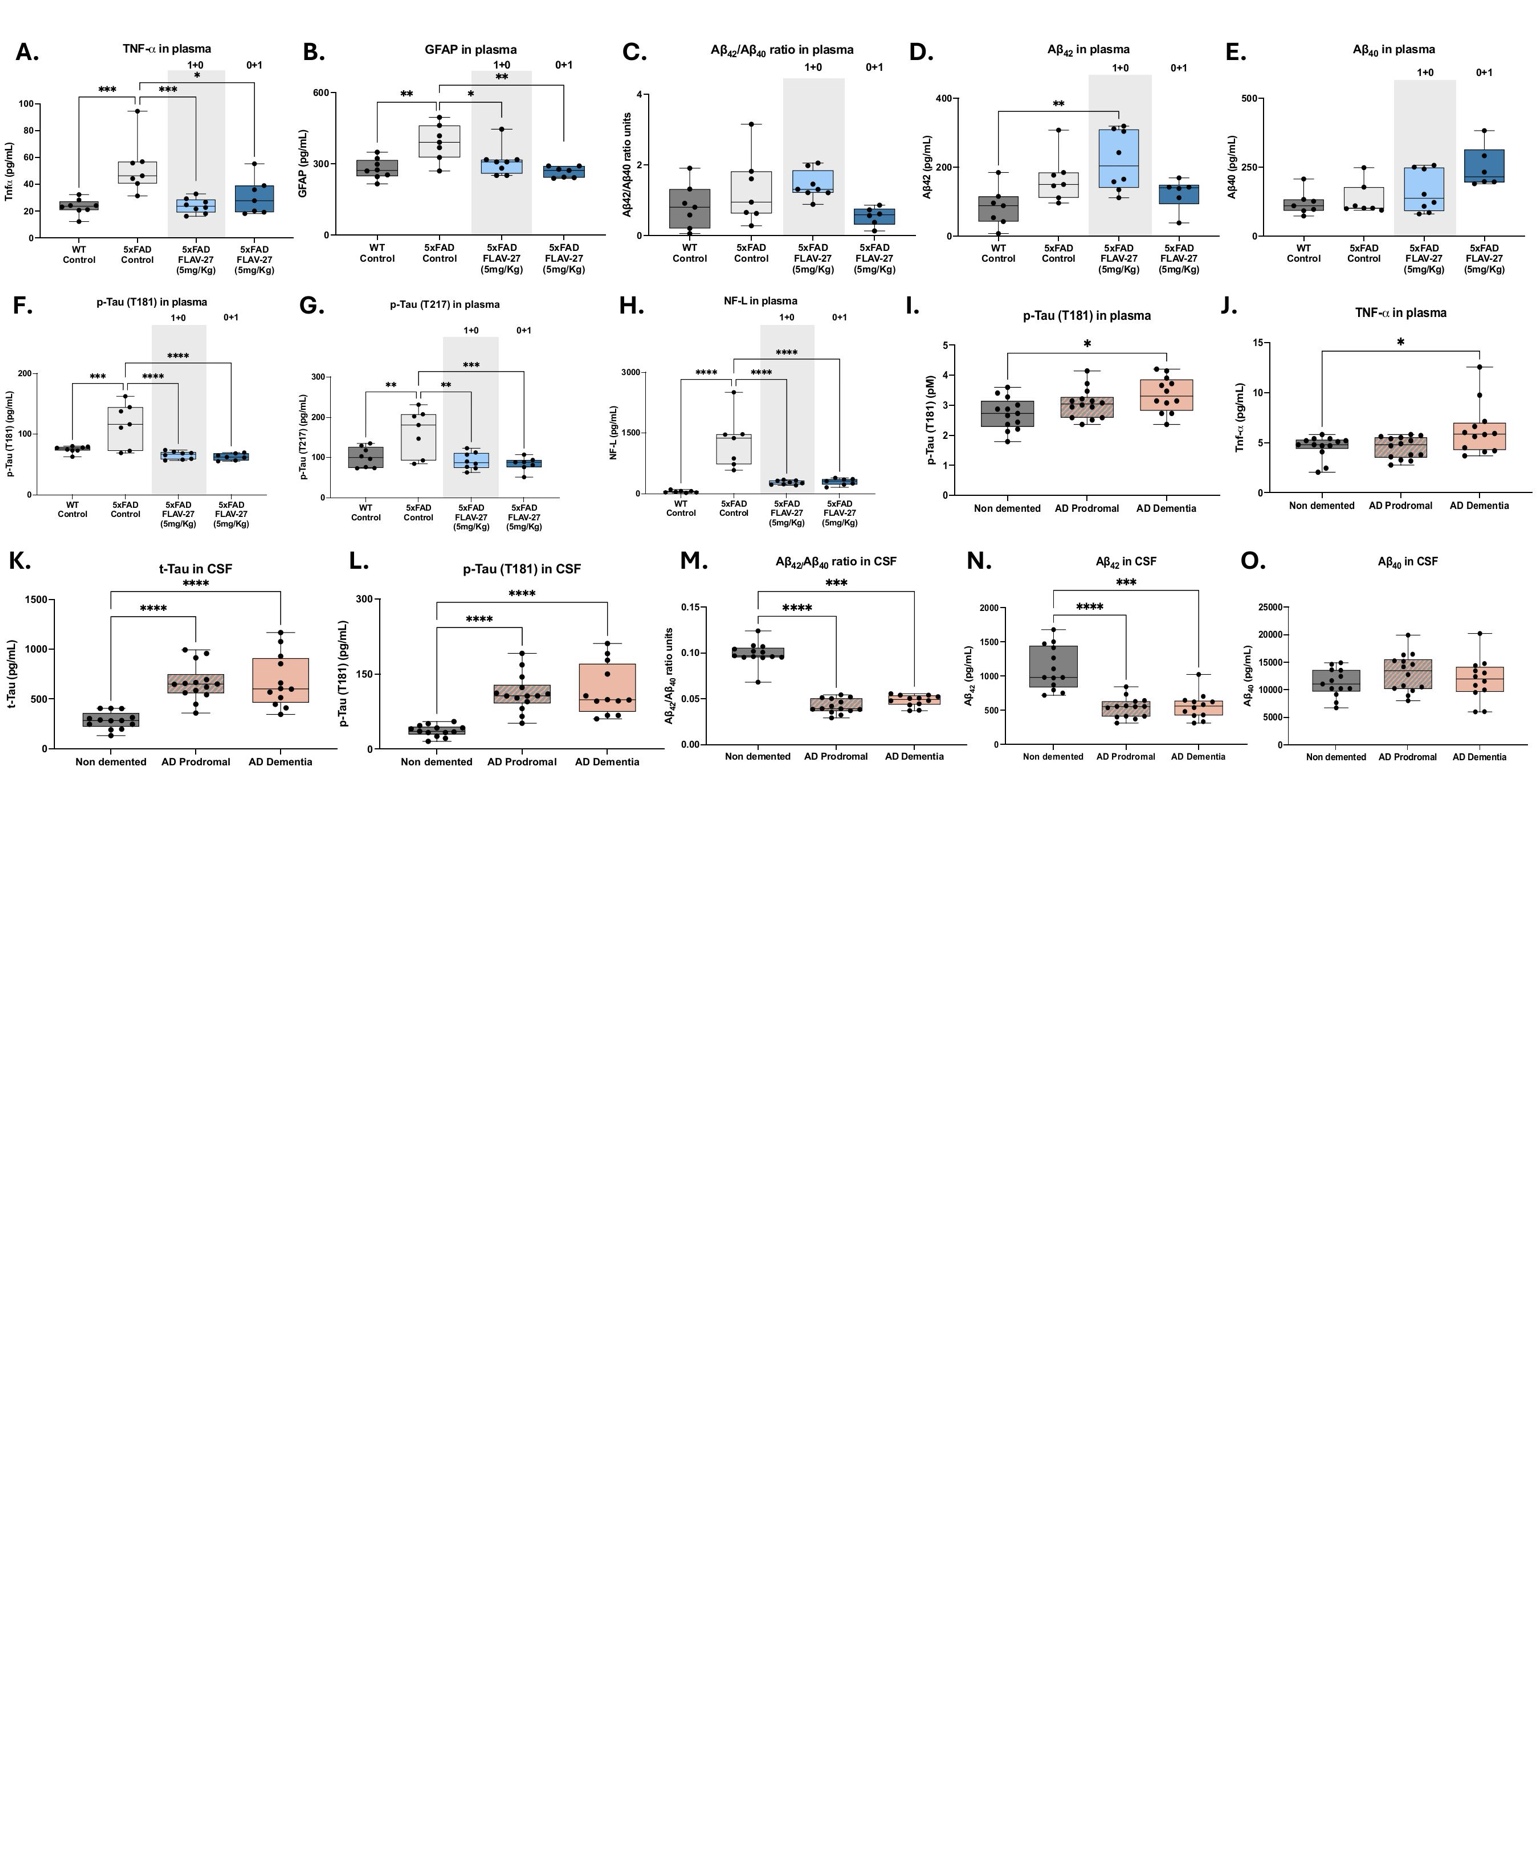
**

**Figure S10.** Fluids biomarker after FLAV-27 treatment in 5xFAD mice. **A.** Plasma levels of TNF-a, **B.** GFAP, **C.** ratio of Aβ42/Aβ40, **D.** Aβ42, **E.** Aβ40, **F.** p-TauT181, **G.** p-TauT217, and **H.**  NF-L.Values presented as the mean ± SEM; (N = 4 groups; WT Control n = 8, 5xFAD Control n = 7, 5xFAD FLAV-27 1+0 (5mg/Kg) n = 8, and 5xFAD FLAV-27 0+1 (5mg/Kg) n = 7); Statistics analysis: One-way ANOVA followed with Tukey post-hoc analysis. In some cases, student’s t-test analysis was also performed ; */#p<0.05; **p<0.01; ***p<0.001. **I.** Plasma levels of p-Tau (T181)and **J.** TNF-a. **K.** CSF levels oft-Tau, **L.** p-Tau (T181) **M.** Aβ42/Aβ40 ration, **N.** Aβ42, **O.** Aβ40. Values presented are the mean ± SEM; (N = 3 groups; Non demented n = 13, AD Prodromal n = 14, AD dementia n = 12); Statistics analysis: One-way ANOVA followed with Tukey post-hoc analysis. In some cases, student’s t-test analysis was also performed ; *p<0.05; **p<0.01; ***p<0.001; ****p<0.0001.

**
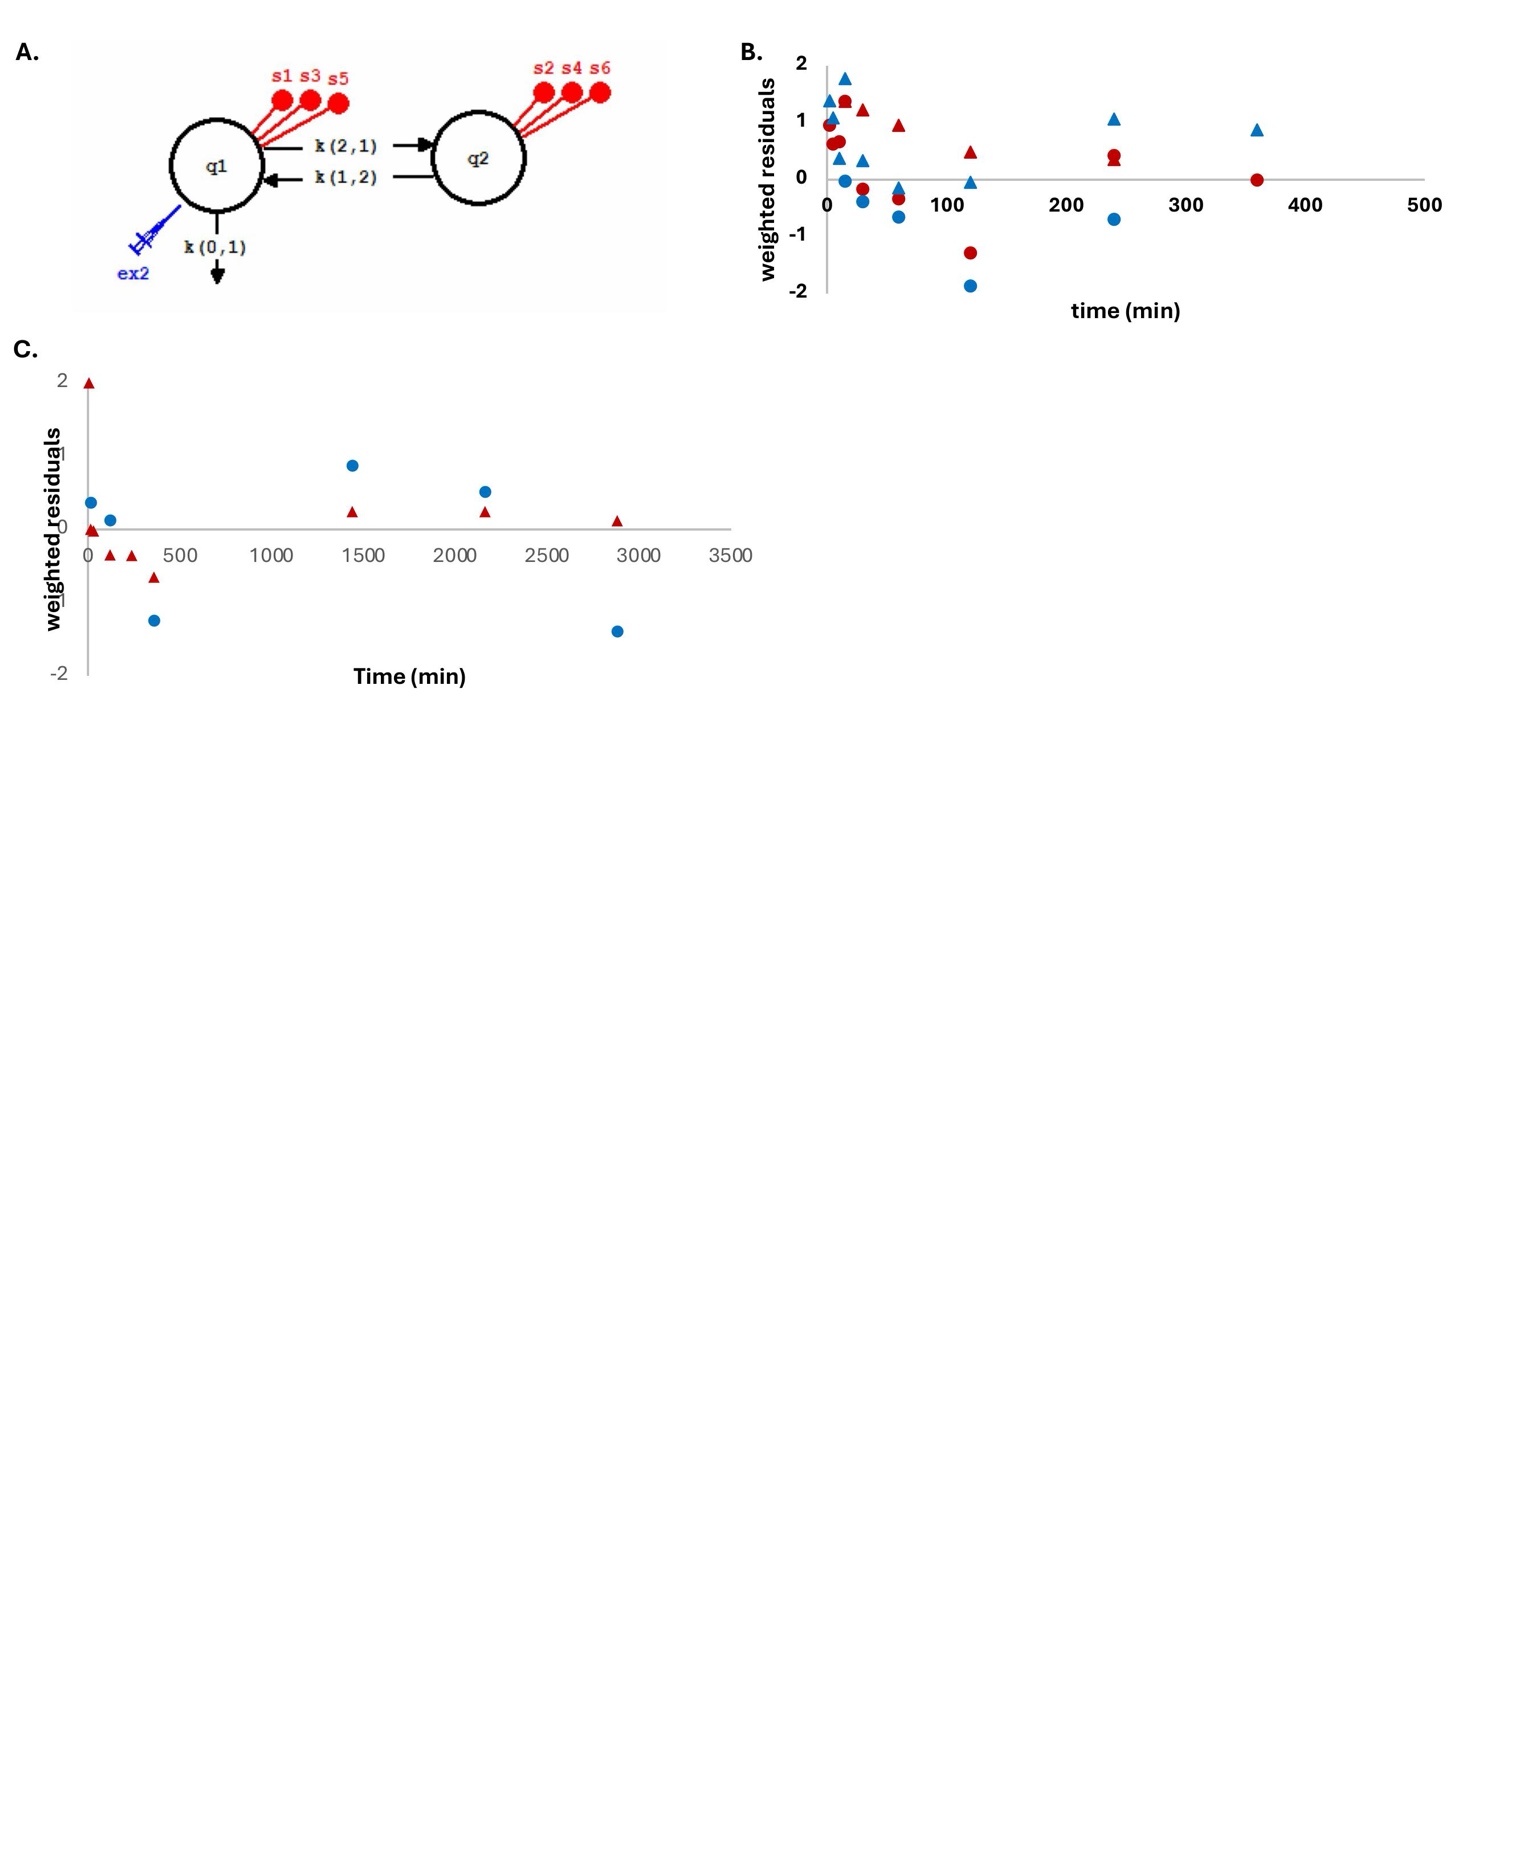
**

**Figure S11.** **A.** Pharmacokinetic model used for the assessment of plasma and brain FLAV-27 concentrations after oral and i.p. administration of FLAV27 base. Amounts of FLAV-27 in plasma are linked to plasma concentrations after i.p. (s1) and oral (s2) simultaneously coupled to the brain concentrations after i.p. (s3) and oral (s4) routes. FLAV27 salt oral route is represented as s5 when data is associated to plasma concentrations and s6 to brain concentrations. The volume of distribution in central (Vc/F) compartment is determined as s1=q1/Vc/F and s2=q1/Vc/F. The volume of distribution in peripheral (Vp/F) compartment is assessed as s3=q2/Vp/F and also s4=q2/Vp/F, being F an unknown oral bioavailability. **B.** Plot of weighted residuals in all the experimental time points obtained in plasma and brain observations estimating the prediction errors of the model for plasma (triangles) and brain concentrations (circles) after oral (blue) and i.p. (red) administration of 5mg/Kg of FLAV-27 base formulated in oil. **C.** Plot of weighted residuals in all the experimental time points obtained in plasma and brain observations estimating the prediction errors of the model for plasma (red triangles) and brain concentrations (blue circles) after oral administration of 5mg/Kg of FLAV-27 salt formulation.

**Table S1.** Compounds with alternative substituents on the phenyl ring of piperidine.

| Compound | R | IC50 G9a ± SD  (nM) | % inh GLP ± SDa  (1 µM) |
| --- | --- | --- | --- |
| 1 | *m*-OH | 0.6 ± 0.001 | 3.2 ± 0.3 |
| 2 | *m*-NH2 | 30.1 ± 0.01 | 20.8 ± 5.9 |
| 3 | *m*-Cl | 60.1 ± 0.01 | <1 |
| 4 | *m*-CO2CH3 | 19.1 ± 0.002 | <1 |
| 5 | *m*-CH3 | >1 µM | 28.8 ± 1.2 |
| 6 | *m*-CN | >1 µM | 27.2 ± 1.9 |
| 7 | *m*-CF3 | >1 µM | 89.1 ± 0.6 |
| 8 | *m*-SO2CH3 | >1 µM | 53.8 ± 2.5 |
| 9 | *m*-Br | >1 µM | 36.1 ± 0.7 |
| 10 | *p*-OH | 21.3 ± 0.03 | 21.9 ± 3.9 |
| 11 | *p*-NH2 | 266 ± 0.01 | 17.6 ± 3.7 |
| 12 | *p*-Cl | 12.3 ± 0.03 | 60.0 ± 0.9 |
| 13 | *p*-OCH3 | 754 ± 0.07 | 77.2 ± 1.4 |
| 14 | *p*-Br | >1 µM | 69.5 ± 0.7 |
| 15 | *p*-F | >1 µM | 71.9 ± 1.7 |
| 16 | *p*-CH3 | >1 µM | 53.3 ± 2.7 |
| 17 | *o*-OH | 16.7 ± 0.001 | <1 |
| 18 | *o*-NH2 | >1 µM | 52.8 ± 0.2 |
| 19 | *o*-CH3 | >1 µM | 14.1 ± 0.5 |
| 20 | *o*-F | >1 µM | 35.1 ± 0.6 |
| 21 | *o*-OH, *p*-CH3 | >1 µM | 9.2 ± 0.7 |
| 22 | *o*-OH, *p*-F | >1 µM | 35.7 ± 1.1 |
| 23 | *m,m*-diCl | 165.6 ± 0.04 | 77.2 ± 1.3 |
| 24 | H | >1 µM | 43.9 ± 2.5 |

aEach value is the mean ± SD of at least two experiments performed in duplicate.

**Table S2.** Analogs with replacement of the *m*-hydroxyphenyl group by heterocyclic rings.

| Compound | R | IC50 G9a ± SD | % Inh GLP ± SDa  (1 µM) |
| --- | --- | --- | --- |
| 25 |  | >1 µM | 97.3 ± 0.3 |
| 26 |  | >1 µM | 72.8 ± 0.1 |
| 27 |  | >1 µM | 14.6 ± 1.2 |
| 28 |  | >1 µM | 57.7 ± 1.4 |
| 29 |  | >1 µM | <1 |
| 30 |  | >1 µM | 4.2 ± 0.4 |
| 31 |  | >1 µM | 9.3 ± 0.03 |

aEach value is the mean ± SD of at least two experiments performed in duplicate.

**Table S3.** Compounds with 1,3-oxazepane ring contracted to a morpholine ring.

| Compound | R | IC50 G9a ± SD  (nM) | % Inh GLP ± SDa  (1 µM) |
| --- | --- | --- | --- |
| 32 | *m*-OH | 45 ± 0.012 | 35.4 ± 0.9 |
| 33 | *m*-NH2 | 97.8 ± 0.02 | 4.18 ± 1.9 |
| 34 | *m*-CF3 | >1 µM | 23.2 ± 0.5 |
| 35 | *p*-OH | 6.7 ± 0.1 | <1 |
| 36 | *p*-NH2 | >1 µM | 64.6 ± 0.5 |
| 37 | *p*-Cl | 100 ± 0.02 | 6.1 ± 0.9 |
| 38 | *o*-CH3 | >1 µM | 4.9 ± 0.1 |
| 39 | *m,m*-diCl | 128.3 ± 0.01 | 11.1 ± 0.5 |

aEach value is the mean ± SD of at least two experiments performed in duplicate.

**Table S4.** Compounds with a methyl group on the nitrogen atom of the 1,3-oxazepan ring.

| Compound | R | IC50 G9a ± SD  (nM) | % Inh GLP ± SDa  (1 µM) |
| --- | --- | --- | --- |
| 40 | *m*-NH2 | >1 µM | 36.5 ± 1.0 |
| 41 | *m*-OCH3 | >1 µM | 6.5 ± 0.03 |
| 42 | *p*-OH | 192.8 ± 0.04 | <1 |
| 43 | *p*-OCH3 | 122.5 ± 0.01 | 0.8 ± 1 |
| 44 | *p*-NH2 | >1 µM | 19.7 ± 1 |
| 45 | *o*-CH3 | >1 µM | 14.7 ± 0.8 |

aEach value is the mean ± SD of at least two experiments performed in duplicate.

**Table S5.** Analogs with alternative substituted benzyl ring on the nitrogen of the 1,3-oxazepane.

| Compound | R | IC50 G9a ± SD  (nM) | % Inh GLP ± SDa  (1 µM) |
| --- | --- | --- | --- |
| 1 | Ph | 0.6 ± 0.1 | 3.24 ± 0.3 |
| 46 | *p*-CH3Ph | >1 µM | 6.7 ± 0.7 |
| 47 | *p*-ClPh | 1.7 ± 0.1 | 32.6 ± 1.2 |
| 48 | *p*-CH3OPh | >1 µM | 30.5 ± 0.6 |
| 49 | *m,p*-diClPh | >1 µM | 40.5 ± 2.3 |

aEach value is the mean ± SD of at least two experiments performed in duplicate.

**Table S6**. Data collection and refinement statistics for the structure determination of SET domain of G9a with **FLAV-27** inhibitor.

| **Data Collection** | |
| --- | --- |
| Space group | P1 |
| Cell dimensions |  |
| a, b, c (Å) | 44.123 55.705 67.126 |
| α, β, γ (°) | 89.35 73.18 67.04 |
| Beamline | ALS-Berkley |
| Wavelength (Å) | 1.000 |
| Resolution (Å)* | 42.33-2.70 (2.83-2.70) |
| Observed reflections* | 51563 (6200) |
| Unique reflections* | 14539 (1849) |
| Rmeas* | 0.088 (0.642) |
| CC1/2* | 0.996 (0.857) |
| <I/σ(I)>* | 7.4 (1.7) |
| Completeness (%) * | 94.4 ((90.4) |
| Redundancy* | 3.5 (3.4) |
| **Refinement** | |
| Resolution (Å) | 42.33-2.70 |
| Reflection used in refinement | 13787 |
| Rwork/Rfree | 0.26/0.30 |
| Number of non-hydrogen atoms | 4282 |
| Macromolecules | 4183 |
| Solvent | 39 |
| Ligand | 56 |
| Protein residues | 532 |
| Average B factor | 62.8 |
| RMS (Bond length) | 0.0035 |
| RMS (Bond angles) | 1.1597 |
| Ramachandran favored (%) | 92.4 |
| Ramachandran allowed (%) | 7.6 |
| Ramachandran outliers (%) | 0 |

*Number in parenthesis refer to values in outer shells. Rfree was calculated using a dataset in which a randomly selected 5% of the reflections were removed prior to refinement.

**Table S7**. Permeability (*Pe* 10-6 cm s-1) in the PAMPA-BBB assay of the 14 commercial drugs predictivepenetration in the CNS used as Preference.

| **Compound** | **Bibliography value(a)** | **Experimental value (n=3) ± S.D.** | **CNS Prediction** |
| --- | --- | --- | --- |
| **Verapamil** | 16.0 | 25.3±0.8 | CNS+ |
| **Testosterone** | 17.0 | 28.0±0.5 | CNS+ |
| **Costicosterone** | 5.1 | 6.7±0.1 | CNS+ |
| **Clonidine** | 5,3 | 6.5±0.1 | CNS+ |
| **Ofloxacin** | 0.8 | 0.1±0.1 | CNS- |
| **Lomefloxacin** | 0.0 | 0.9±0.3 | CNS- |
| **Progesterone** | 9.3 | 16.8±0.3 | CNS+ |
| **Promazine** | 8.8 | 13.8±0.3 | CNS+ |
| **Imipramine** | 13.0 | 12.5±0.2 | CNS+ |
| **Hidrocortisone** | 1.9 | 1.4±0.1 | CNS- |
| **Piroxicam** | 2.5 | 2.4±0.1 | CNS- |
| **Desipramine** | 12.0 | 17.8±0.1 | CNS+ |
| **Cimetidine** | 0.0 | 0.7±0.03 | CNS- |
| **Norfloxacine** | 0.1 | 8.8±0.5 | CNS+ |
| a)Taken from Di et al.[2] |  |  |  |

**Table S8**. Permeability results (*Pe* 10-6 cm s-1) from the PAMPA-BBB assay for new report compounds and their

prediction of BBB permeation.

| **Compound** | **Experimental value (n=3) ± S.D.** | ***CNS Prediction*** |
| --- | --- | --- |
| **1** | >30 | CNS+ |
| **Enantiomer 1A** | 9.2±0.9 | CNS+ |
| **Enantiomer 1B** | 11.7±1.0 | CNS+ |
| **2** | 15.7±0.6 | CNS+ |
| **3** | 9.2±3.2 | CNS+ |
| **4** | 15.3±1.7 | CNS+ |
| **5** | 10.3±0.3 | CNS+ |
| **6** | 11.9±3.8 | CNS+ |
| **7** | 4.3±0.4 | CNS ± |
| **8** | 6.8±0.2 | CNS+ |
| **9** | 3.05±0.4 | CNS ± |
| **10** | >30 | CNS+ |
| **11** | 13.8±0.7 | CNS+ |
| **12** | 4.9±0.6 | CNS ± |
| **13** | 11.5±0.8 | CNS+ |
| **14** | >30 | CNS+ |
| **15** | 6.35±0.5 | CNS+ |
| **16** | 14.3±1.1 | CNS+ |
| **17** | 7.5±0.5 | CNS+ |
| **18** | 26.1±1.2 | CNS+ |
| **19** | ND** | ND** |
| **20** | 19.4±1.1 | CNS+ |
| **21** | 3.8±.1.4 | CNS ± |
| **22** | 5.9±0.6 | CNS+ |
| **23** | 1.55±0.3 | CNS− |
| **24** | 14.5±1.2 | CNS+ |
| **25** | 11.8±2.1 | CNS+ |
| **26** | 10.6±0.6 | CNS+ |
| **27** | 14.8±1.1 | CNS+ |
| **28** | 11.7±0.7 | CNS+ |
| **29** | 13.8±0.7 | CNS+ |
| **30** | 5.9±0.15 | CNS+ |
| **31** | 18.5±1.7 | CNS+ |
| **32** | 5.1±0.1 | CNS+/− |
| **33** | 11.4±1.2 | CNS+ |
| **34** | 14.8±1.9 | CNS+ |
| **35** | 14.4±0.9 | CNS+ |
| **36** | 11.3±1.5 | CNS+ |
| **37** | 11.4±1.1 | CNS+ |
| **38** | 21.2±0.8 | CNS+ |
| **39** | 18.7±2.5 | CNS+ |
| **40** | 3.5±0.4 | CNS+/− |
| **41** | 1.8±0.2 | CNS+/− |
| **42** | 0.04±0.003 | CNS− |
| **43** | 3.35±1.2 | CNS+/− |
| **44** | 1.1±0.2 | CNS− |
| **45** | 16.4±4.5 | CNS+ |
| **46** | 12.3±2.2 | CNS+ |
| **47** | 12.4±0.9 | CNS+ |
| **48** | 0.2±0.03 | CNS− |
| **49** | 9.8±1.0 | CNS+ |

**Table S9*.***Pharmacokinetic parameters obtained in mice after 5 mg/Kg of FLAV-27. FLAV-27 base formulation was administered by oral and i.p administration and FLAV-27 salt only by oral route. A and B are plasma compound concentrations at time 0 in the central and peripheral compartments respectively. The parameters  and are macroconstants corresponding to the rate of compound elimination from central and peripheral compartments respectively. Constants k(0,1) is the elimination constant from the plasma compartment, and k(2,1) with k(1,2) are intercompartimental rate constants. Vc/F is the volume of distribution obtained in the plasma compartment and Vp/F the volume of distribution in the brain. AUC0-∞ is the calculated area under the concentration time curve of plasma concentrations from time 0 to infinity, CL/F is the plasma clearance, t1/2 the plasma halflife, and MRT the mean residence time in plasma. Cmaxp.o. concentration is the maximun plasma concentration observed at Tmax after oral administration and Cmaxi.p. is the maximum plasma concentrations after i.p. administration. Brain Cmax p.o. and Cmax i.p. are brain concentrations after oral and i.p. observed at the corresponding times of respective values in plasma. B/R ratio is the relationship between observed brain and plasma maximum concentrations Cmax. Objective Function (OF), Akaike information criteria (AIC) and Bayesian information criterion (BIC) values are estimates corresponding to the selected model. (nd = not determined)

| **FLAV-27** |  | **Base** | | **Salt** | |
| --- | --- | --- | --- | --- | --- |
| **Plasma** |  | **estimate** | **IC95%** | **estimate** | **IC95%** |
| a | min-1 | 0.03 | 0.02-0.04 | 0.1 | 0.13-0.13 |
| b | min-1 | 0.01 | 0.01-0.01 | 0.04 | 0.04-0.05 |
| A | ng/mL | 116.6 | 71.9-161.2 | 2800.3 | 2295.8-3304.9 |
| B | ng/mL | 21.8 | 15.1-28.3 | 3225.5 | 2839.8-3611.1 |
| Vc/F | mL | 675.2 | 426.4-923.9 | 15.4 | 15.1-15.7 |
| Vp/F | mL | 10 | 6.9-13.11 | 6.5 | 1.9-11.04 |
| k(0,1) | min-1 | 0.01 | 0.002-0.01 | 0.002 | 0.002-0.002 |
| k(1,2) | min-1 | 0.01 | 0.002-0,01 | 0.07 | 0.07-0.07 |
| k(2,1) | min-1 | 0.01 | 0.08-0.02 | 0.02 | 0.01-0.02 |
| AUC0-∞ po | ng.min/mL | 32450.9 | 20567-44334 | 3335200 | 3061322-3609077 |
| AUC0-last po | ng.min/mL | 26983 | 22832-52547 | 2741811.9 | 1874249-3581490 |
| AUC0-last ip | ng.min/mL | 20799 | 8386-33211 | nd | - |
| CL/F | mL/min | 3.9 | 2.4-5.3 | 0.03 | 0.03-0.03 |
| t1/2 | min | 105.3 | 63.1-179.8 | 45.5 | 42.1-48.9 |
| MRT | min | 175.2 | 91.1-259.4 | 413 | 373.5-452.4 |
| Vss/F | mL | 675.2 | 426.3-923.9 | 15.5 | 15.2-15.8 |
| Cmax p.o. | ng/mL | 441.2 | 364.3-805.5 | 3497.3 | 2593.7-4400.9 |
| Tmax p.o. | min | 15 |  | 30-120 |  |
| Cmax i.p. | ng/mL | 538.7 | 422.6-654.6 | nd | - |
| **Brain** |  |  |  |  |  |
| Cmax p.o. | ng/mL | 2246.7 | 1017.7-3475.6 | 1730.4 | 1663.5-1797.2 |
| AUC0_last po | ng.min/mL | 450149.2 | 250725-649572 | 1324477.1 | 1160255-1488698 |
| Cmax i.p. | ng/mL | 3914.3 | 2385-7428 | nd |  |
| AUC0_last ip | ng.min/mL | 2080718 | 709903-2996778 | nd |  |
| **B/P ratio** |  |  |  |  |  |
| Cmax i.p. B/P Ratio | unitless | 5.9 |  | nd |  |
| Cmax p.o. B/P Ratio | unitless | 3.8 |  | 0.5 |  |
| **Model selection** |  |  |  |  |  |
| OF | unitless | 11.9 |  | 12.1 |  |
| AIC | unitless | 7.1 |  | 7.4 |  |
| BIC | unitless | 7.3 |  | 7.6 |  |

**Table S10.** A. Mutagenic activity of FLAV-27 using *S. typhimurium* TA98 and TA100 without S9 activation. B. Mutagenic activity of FLAV-27 using *S. typhimurium* TA98 and TA100 with S9 activation. Abbreviations: 2-NF: 2-nitrofluorene; 4-NQO: 4-nitroquinoline-N-oxide; 2-AA: 2- aminoanthracene.

|  |  | **TA98 - S9** | | | **TA98 + S9** | | | Mutagenic Conc./  Cytotoxic effect |
| --- | --- | --- | --- | --- | --- | --- | --- | --- |
|  |  | Number positive wells | | | Number positive wells | | |
| Sample | Concetration  (µM) | Replicate #1 | Replicate #2 | Replicate #3 | Replicate #1 | Replicate #2 | Replicate #3 |
| **FLAV-27** | 0  3.125  6.25  12.5  25 | 2  0  0  0  0 | 0  1  2  3  1 | 0  0  0  1  0 | 0  2  0  3  2 | 1  2  2  1  0 | 1  0  1  2  1 |  |
| 2-NF | 2 µg/mL | 39 | 41 | 40 |  |  |  | Mutagenic Conc. |
| 2-AA | 1 µg/mL |  |  |  | 46 | 40 | 43 |

|  |  | **TA100 - S9** | | | **TA100 + S9** | | | Mutagenic Conc./  Cytotoxic effect |
| --- | --- | --- | --- | --- | --- | --- | --- | --- |
|  |  | Number positive wells | | | Number positive wells | | |
| Sample | Concetration  (µM) | Replicate #1 | Replicate #2 | Replicate #3 | Replicate #1 | Replicate #2 | Replicate #3 |
| **FLAV-27** | 0  3.125  6.25  12.5  25 | 4  3  4  1  1 | 0  1  3  2  1 | 2  1  1  3  1 | 2  3  4  1  3 | 1  3  2  4  1 | 2  1  2  8  2 |  |
| 2-NQO | 0.1 µg/mL | 38 | 40 | 42 |  |  |  | Mutagenic Conc. |
| 2-AA | 2.5 µg/mL |  |  |  | 45 | 48 | 44 |

**Table S11.** Results of compound and positive control (CTR+) in MNT test. Compound is assayed at different concentrations and results are calculated in terms of number of binucleate cells, cytostasis percentage ± SD and percentage of micronuclei in binucleate cells ± SD.

| **Sample** | **Concentration** | **No. binucleate cells** | **% Cytostasis** | **% MN** |
| --- | --- | --- | --- | --- |
| FLAV-27 | 200 μM | 725 | 11.7 | 6.3 |
| FLAV-27 | 100 μM | 1188 | 0 | 7.7 |
| FLAV-27 | 50 μM | 1244 | 0 | 6.9 |
| FLAV-27 | 25 μM | 1378 | 0 | 6.6 |
| FLAV-27 | 12.5 μM | 1659 | 0 | 6.5 |
| CTR- |  | 1487 | - | 7.2 |
| CTR + (MitoC) | 1 μM | 411 | 37.7 | 28.9 |
| CTR + (MitoC) | 0.5 μM | 815 | 16.8 | 19.0 |

**Table S12.** Antibodies used in Western Blot and IHC studies.

| Antibody | Host | Source/Catalog | WB Dilution |
| --- | --- | --- | --- |
| H3K9me2 | Rabbit | Epigentek/A-4035 | 1:1000 |
| H3K18me1 | Rabbit | Epigentek/A-68374 | 1:1000 |
| H3K18me2 | Rabbit | Novus/NB21-1142SS | 1:1000 |
| H3K18me3 | Rabbit | Novus/NB21-1143SS | 1:1000 |
| H3K23me1 | Rabbit | MyBioSource/MBS3388469 | 1:1000 |
| H3K23me2 | Rabbit | MyBioSource/MBS388528 | 1:1000 |
| H3K23me3 | Rabbit | MyBioSource/MBS388924 | 1:1000 |
| H3 Total | Rabbit | Cell signaling/#9715 | 1:1000 |
| SMOC1 | Rabbit | Invitrogen/PA5-1134408 | 1:1000 |
| GAPDH | Mouse | Millipore/MAB374 | 1:2500 |
| Goat-anti-mouse HRP conjugated | Goat | Biorad/170-5047 | 1:2000 |
| Goat-anti-rabbit HRP conjugated | Goat | Biorad/170-6515 | 1:2000 |
|  |  |  |  |
| Antibody | **Host** | **Source/Catalog** | **ICH Dilution** |
| GFAP | Rabbit | Dako/Z0334 | 1:1000 |
| SMOC1 | Rabbit | Invitrogen/PA5-1134408 | 1:100 |
| Alexa Fluor 647 donkey anti-rabbit | Donkey | Invitrogen/A31573 | 1:200 |
| Alexa Fluor Plus 555 donkey-anti rabbit | Donkey | Invitrogen/A32794 | 1:200 |

**Table S13.** Primer sequences of real-time qPCR (SYBR Green primers).

| Target | Forward Primer (5’-3’) | Reverse Primer (5’-3’) |
| --- | --- | --- |
| *Syt4* | CCGCGTGGAATTCGATGAAA | CTGACAGCAGATCCAGGCAA |
| *Arc* | GCCCCCAGCAGTGATTCATA | GGAACCCATGTAGGCAGCTT |
| *Tnf-α* | GCTGCACTTTGGAGTGATCG | GGGAGAGTGGATGAAGGCTG |
| *Il-6* | ATCCAGTTGCCTTCTTGGGACTGA | TAAGCCTCCGACTTGTGAAGTGGT |
| *Elavl4* | ACCAGAGTTTGATGAGAGCAACT | TCCATGGTGCTAATTATCTGGC |
| *Syt7* | CGAAGGGGACCATGTACCG | TCTTGTAGCGTTTGCCCAGT |
| *Dcx* | AGGTAACGACCAAGACGCAAA | TACCTTGTGCTTCCGCAGAC |
| *Camk2d* | AGATCCTGGAGGCTGTGCTA | GTGCCAGCAAAACCAAACCA |
| *Vgf* | GTCAGACCCATAGCCTCCC | CTCGGACTGAAATCTCGAAGTTC |
| *Ftl-1* | GCGGACCCTCATCTCTGTGA | GAGCCCCTTGGAAGGTACAG |
| *Fth-1* | CTTCCCTCCCGACCTTTGTT | GTCTCTTTGGCAGGTCGTGA |
| *Gpx4* | CCCTGTACTTATCCAGGCAGA | GATGGAGCCCATTCCTGAACC |
| *Fsp1* | TGGTTGGTCAGTCTCTCGAC | AAGAACCGGATGGTGTTGCT |
| *β-actin* | CAACGAGCGGTTCCGAT | GCCACAGGTTCCATACCCA |

**Table S14**. Patient data of the parietal brain samples from the Institute of Neuropathology-IDIBELL Brain Bank, Hospitalet de Llobregat.

| Gender | Age | Postmortem delay | Diagnosis |
| --- | --- | --- | --- |
| Male | 85 | 5 h 45 min | Control |
| Male | 78 | 2 h 15 min | Control |
| Male | 79 | 7h | Control |
| Male | 52 | 3 h 20 min | Control |
| Female | 72 | 2 h 45 min | Control |
| Female | 49 | 5 h | Control |
| Male | 93 | 7 h 20 min | AD BRAAK STAGE V/C |
| Male | 85 | 5 h 15 min | AD BRAAK STAGE V/C |
| Male | 74 | 6 h 30 min | AD BRAAK STAGE V/C |
| Female | 83 | 3 h 20 min | AD BRAAK STAGE V/C |
| Female | 82 | 1 h 45 min | AD BRAAK STAGE V/B |
| Female | 72 | 9 h 30 min | AD BRAAK STAGE V/B |
| Female | 75 | 4 h 15 min | AD BRAAK STAGE V/B |
| Female | 85 | 2 h 10 min | AD BRAAK STAGE V/B |

**Table S15**. Patient data of the plasma and CSF samples from Sant Pau Initiative on Neurodegeneration.

| Gender | Age | ASTATUS | GDS | MMSE | Diagnostic |
| --- | --- | --- | --- | --- | --- |
| Male | 53 | Aneg | 1 | 27 | Control |
| Male | 57 | Aneg | 1 | 29 | Control |
| Male | 72 | Aneg | 1 | 28 | Control |
| Female | 60 | Aneg | 1 | 29 | Control |
| Female | 64 | Aneg | 1 | 29 | Control |
| Female | 71 | Aneg | 1 | 30 | Control |
| Male | 76 | Apos | 4 | 23 | AD |
| Male | 76 | Apos | 4 | 24 | AD |
| Male | 79 | Apos | 4 | 26 | AD |
| Female | 78 | Apos | 4 | 22 | AD |
| Male | 55 | Aneg | 1 | 27 | Control |
| Male | 81 | Apos | 4 | 22 | AD |
| Female | 77 | Apos | 4 | 22 | AD |
| Female | 76 | Apos | 4 | 24 | AD |
| Female | 66 | Aneg | 1 | 29 | Control |
| Female | 62 | Aneg | 1 | 30 | Control |
| Female | 76 | Apos | 4 | 27 | AD |
| Male | 77 | Apos | 4 | 19 | AD |
| Female | 78 | Apos | 4 | 22 | AD |
| Male | 80 | Apos | 3 | 23 | AD - Prodromal |
| Female | 76 | Apos | 3 | 15 | AD - Prodromal |
| Female | 81 | Apos | 3 | 26 | AD - Prodromal |
| Male | 76 | Apos | 3 | 29 | AD - Prodromal |
| Female | 80 | Apos | 3 | 26 | AD - Prodromal |
| Male | 79 | Apos | 3 | 26 | AD - Prodromal |
| Male | 79 | Apos | 3 | 25 | AD - Prodromal |
| Female | 80 | Apos | 3 | 29 | AD - Prodromal |
| Female | 80 | Apos | 3 | 26 | AD - Prodromal |
| Male | 77 | Apos | 3 | 22 | AD - Prodromal |
| Male | 61 | Aneg | 1 | 28 | Control |
| Male | 52 | Aneg | 1 | 30 | Control |
| Female | 62 | Aneg | 1 | 30 | Control |
| Female | 53 | Aneg | 1 | 29 | Control |
| Female | 68 | Apos | 5 | 11 | AD |
| Female | 75 | Apos | 3 | 26 | AD - Prodromal |
| Male | 84 | Apos | 3 | 27 | AD - Prodromal |
| Male | 71 | Apos | 3 | 25 | AD - Prodromal |
| Female | 78 | Apos | 3 | 26 | AD - Prodromal |
| Male | 74 | Apos | 4 | 21 | AD |
